1 ***Bovine polyomavirus-1 (Epsilonpolyomavirus bovis): An emerging fetal pathogen of***  
2 **cattle that causes renal lesions resembling polyomavirus-associated nephropathy of**  
3 **humans**

4 Short title: ***Bovine polyomavirus-1 is fetopathogenic***

5 Federico Giannitti<sup>1\*</sup>, Caroline da Silva Silveira<sup>1</sup>, Hannah Bullock<sup>2</sup>, Marina Berón<sup>1</sup>,  
6 Sofía Fernández<sup>1</sup>, María José Benítez-Galeano<sup>3</sup>, Nélica Rodríguez-Osorio<sup>3</sup>, Luciana  
7 Silva-Flannery<sup>4</sup>, Yisell Perdomo<sup>1</sup>, Andrés Cabrera<sup>5,6</sup>, Rodrigo Puentes<sup>5</sup>, Rodney  
8 Colina<sup>7</sup>, Jana M. Ritter<sup>4</sup>, Matías Castells<sup>7\*</sup>

9 <sup>1</sup> Plataforma de Investigación en Salud Animal, Instituto Nacional de Investigación  
10 Agropecuaria (INIA), Estación Experimental La Estanzuela, Colonia, Uruguay

11 <sup>2</sup> Synergy America Inc., Atlanta, GA, USA

12 <sup>3</sup> Unidad de Genómica y Bioinformática, Departamento de Ciencias Biológicas, Centro  
13 Universitario Regional (CENUR) Litoral Norte, Universidad de la República, Salto,  
14 Uruguay

15 <sup>4</sup> Infectious Diseases Pathology Branch, Centers for Disease Control and Prevention  
16 (CDC), Atlanta, Georgia, USA

17 <sup>5</sup> Facultad de Veterinaria, Universidad de la República, Montevideo, Uruguay

18 <sup>6</sup> Laboratorio de Interacciones Hospedero-Patógeno, Institut Pasteur de Montevideo,  
19 Montevideo, Uruguay

20 <sup>7</sup> Laboratorio de Virología Molecular, Departamento de Ciencias Biológicas, Centro  
21 Universitario Regional (CENUR) Litoral Norte, Universidad de la República  
22 (UDELAR), Salto, Uruguay

23 \* Corresponding authors: [fgiannitti@inia.org.uy](mailto:fgiannitti@inia.org.uy) (FG) and [mcastells@unorte.edu.uy](mailto:mcastells@unorte.edu.uy)  
24 (MC)

25

26 **Abstract**

27 *Bovine polyomavirus-1* (BoPyV-1, *Epsilonpolyomavirus bovis*) is widespread in cattle  
28 and has been detected in commercialized beef at supermarkets in the USA and  
29 Germany. BoPyV-1 has been questioned as a probable zoonotic agent with documented  
30 increase in seropositivity in people exposed to cattle. However, to date, BoPyV-1 has  
31 not been causally associated with pathology or disease in any animal species, including  
32 humans. Here we describe and illustrate pathological findings in an aborted bovine fetus  
33 naturally infected with BoPyV-1, providing evidence of its pathogenicity and probable  
34 abortigenic potential. Our results indicate that: (i) BoPyV-1 can cause severe kidney  
35 lesions in cattle, including tubulointerstitial nephritis with cytopathic changes and  
36 necrosis in tubular epithelial cells, tubular and interstitial inflammation, and interstitial  
37 fibroplasia; (ii) lesions are at least partly attributable to active viral replication in renal  
38 tubular epithelial cells, which have abundant intranuclear viral inclusions; (iii) BoPyV-1  
39 large T (LT) antigen, resulting from early viral gene expression, can be detected in  
40 infected renal tubular epithelial cells using a monoclonal antibody raised against Simian  
41 Virus-40 polyomavirus LT antigen; and (iv) there is productive BoPyV-1 replication  
42 and virion assembly in the nuclei of renal tubular epithelial cells as demonstrated by the  
43 ultrastructural observation of abundant arrays of viral particles with typical  
44 polyomavirus morphology. Altogether, these lesions resemble the “cytopathic-  
45 inflammatory pathology pattern” proposed in the pathogenesis of *Human polyomavirus-*  
46 *1*-associated nephropathy in immunocompromised people and kidney allograft  
47 recipients. Additionally, we sequenced the complete genome of the BoPyV-1 infecting

48 the fetus, which represents the first whole genome of a BoPyV-1 from the Southern  
49 Hemisphere. Lastly, the BoPyV-1 strain infecting this fetus was isolated, causing  
50 cytopathic effect in Madin-Darby bovine kidney cells. We conclude that BoPyV-1 is  
51 pathogenic to the bovine fetus under natural circumstances. Further insights into the  
52 epidemiology, biology, clinical relevance, and zoonotic potential of BoPyV-1 are  
53 needed.

54

## 55 **Author Summary**

56 While bovine polyomavirus-1 seems to have a broad geographic distribution, whether  
57 this virus is responsible for disease and organ damage (lesions) in the cattle it infects is  
58 unknown. In this study, we describe and illustrate organ damage in an aborted bovine  
59 fetus naturally infected with bovine polyomavirus-1. Our results indicate that this virus  
60 is pathogenic, this means it can cause lesions and disease under natural circumstances in  
61 cattle. Interestingly, the organ damage in the fetus attributable to this viral infection  
62 closely resembles the lesions caused by related viruses within the same viral family  
63 (*Polyomaviridae*) in immunocompromised human patients and kidney transplant  
64 recipients. This study sets the bases to frame further research to learn more about  
65 whether bovine polyomavirus-1 causes abortion in cattle, and to a broader extent how  
66 polyomaviruses cause disease in animals and humans.

67

## 68 **Introduction**

69 Polyomaviruses are a diverse group of non-enveloped viruses with a small,  
70 circular, double-stranded DNA genome found in a wide variety of mammalian, avian,  
71 fish, amphibian, reptile, and invertebrate species [1]. As of July 2022, according to the

72 International Committee on Taxonomy of Viruses (ICTV, <https://talk.ictvonline.org/>),  
73 the *Polyomaviridae* family contained 8 genera named *Alpha-*, *Beta-*, *Delta-*, *Epsilon-*,  
74 *Eta-*, *Gamma-*, *Theta-* and *Zeta-polyomavirus*, although many strains and species are  
75 awaiting genus assignment. While some polyomaviruses can cause acute disease and  
76 even death due to productive (lytic) replication in their hosts, most of the  
77 polyomaviruses infecting mammals establish persistent subclinical infections in healthy  
78 individuals, resulting in clinical disease only after reactivation of the infection in  
79 immunosuppressed hosts [2].

80 Most information on the biology and medical relevance of polyomaviruses has  
81 been generated in studies of primate and murine polyomaviruses; limited information is  
82 available from other mammalian polyomaviruses in their natural hosts. Prototype  
83 diseases caused by human polyomaviruses include “polyomavirus-associated  
84 nephropathy” (PyVAN) caused by *Human polyomavirus-1* (BK polyomavirus –  
85 BKPyV–, *Betapolyomavirus hominis*) and to a lesser extent *Human polyomavirus-2* (JC  
86 polyomavirus –JCPyV–, *Betapolyomavirus secu hominis*) in kidney transplant  
87 recipients; and “progressive multifocal leukoencephalopathy” (PML) resulting from  
88 replication of JCPyV in oligodendrocytes in patients with acquired immunodeficiency  
89 syndrome or other immunomodulatory conditions [1]. Polyomaviruses have also been  
90 associated with cancer in humans and animals. For example, *Human polyomavirus-5*  
91 (Merkel cell polyomavirus –MCPyV–, *Alphapolyomavirus quinti hominis*) causes  
92 Merkel cell (neuroendocrine) carcinoma of the skin [3], while *Procyon lotor*  
93 *polyomavirus-1* (syn. *Raccoon polyomavirus-1* –RacPyV-1–, *Alphapolyomavirus*  
94 *procyonis*) has been associated with tumors of the olfactory tract and brain in raccoons  
95 [4,5,6].

96           The polyomaviruses currently known as bovine polyomavirus (BoPyV) were  
97 initially discovered in uninoculated cultures of kidney cell lines of stump-tailed  
98 macaques, rhesus monkeys, and cynomolgus macaques, and were referred to as Stump-  
99 Tailed Macaque Virus (STMV) [7], cynomolgus kidney strain (CK-strain) of STMV  
100 [8], and Fetal Rhesus Kidney Virus (FRKV) [9]. Because of their growth in  
101 uninoculated cell cultures, it was initially thought that they were endogenous viruses of  
102 non-human primates. However, it has since been determined that they were  
103 polyomaviruses of bovine origin contaminating the bovine fetal serum used to  
104 supplement cell growth media [10]. Such contamination is frequent in commercial  
105 batches of bovine fetal/calf serum [11,12,13,14,15]. The first polyomavirus isolated in a  
106 bovine kidney cell line was obtained from a healthy newborn calf [16], and was  
107 designated Wokalup Research Station Virus (WRSV). It was suggested shortly after  
108 their discovery that STMV, FRKV, and WRSV were all isolates of an identical BoPyV  
109 [17], which was later supported by viral whole-genome sequencing of the isolate  
110 obtained by Wognum et al. [18].

111           Species of polyomaviruses known to infect live cattle to date include *Bos taurus*  
112 *polyomavirus-1* (syn. *Bovine polyomavirus-1* –BoPyV-1–, *Epsilonpolyomavirus bovis*),  
113 and *Bos taurus polyomavirus-2* (syn. *Bovine polyomavirus-2* –BoPyV-2–, awaiting  
114 genus assignation). A third species named *Bovine polyomavirus-3* (BoPyV-3, awaiting  
115 genus assignation) was originally detected in ground beef samples collected at a  
116 supermarket in the USA [19]. The complete genome sequence for BoPyV-3 is deposited  
117 in GenBank (accession KM496326), but the species is not currently listed by the ICTV.  
118 To the best of our knowledge, BoPyV-1 and BoPyV-3 have never been causally  
119 associated with pathology or disease, while BoPyV-2 has been recently proposed as a  
120 probable cause of nonsuppurative encephalitis in cattle [20].

121           Based on a serologic study in humans, published by authors from the United  
122 Kingdom, BoPyV has been questioned as a zoonotic agent with documented increase in  
123 seropositivity in people occupationally exposed to cattle including veterinarians,  
124 farmers, abattoir workers, veterinary technical staff, and veterinary students [17].  
125 Although these results should be interpreted with caution due to possible cross reaction  
126 of human antibodies to other polyomaviruses [21,22], the risk of zoonotic transmission  
127 of BoPyV should not be neglected and deserves further research.

128           Abortion is a major health problem in cattle, resulting in huge economic losses  
129 to the livestock industry worldwide. It can be caused by many infectious and non-  
130 infectious diseases. Infectious etiologies are amongst the most frequently detected  
131 causes of abortion in ruminant fetuses subjected to routine laboratory diagnostic  
132 investigation, and include a variety of protozoal, bacterial, viral, and fungal pathogens,  
133 many of which are zoonotic [2324]. Because many bovine pathogens can be transmitted  
134 transplacentally from the dam to the fetus without necessarily resulting in abortion,  
135 detecting an infectious agent in the fetus does not warrant abortion causality. However,  
136 pathogen detection coupled with identification of pathogens within lesions observed on  
137 histopathologic examination of the aborted fetus and/or placenta is a powerful indicator  
138 of causality [25]. Given the large spectrum of possible abortigenic pathogens and the  
139 relatively few veterinary diagnostic laboratories that conduct pathologic examinations  
140 with broad pathogen detection in aborted ruminants, especially in low- and middle-  
141 income countries, it is generally accepted that known causes of abortion are  
142 underreported and that many abortifacients remain to be discovered.

143           The aim of this study was to describe and illustrate pathological findings in an  
144 aborted bovine fetus naturally infected with BoPyV-1, providing strong evidence to  
145 consider it fetopathogenic and a probable cause of abortion in cattle. We also sequenced

146 the complete genome of the involved BoPyV-1, which, to the best of our knowledge,  
147 represents the first sequence of a BoPyV-1 from the Southern Hemisphere.

148

## 149 **Results**

### 150 Case history

151 In March 2021, a second-gestation Holstein cow from a *Brucella*-free dairy farm  
152 in Colonia, Uruguay, aborted a male fetus at 234 days (~7.7 months) of gestation. The  
153 fetus was submitted to the veterinary laboratory of the “Instituto Nacional de  
154 Investigación Agropecuaria” (INIA) for pathologic examination.

155

### 156 Gross pathologic examination

157 At autopsy, the fetus was in good state of postmortem preservation, had a fully  
158 developed hair coat, and a crown-to-rump length of 65 cm. There was mild clear  
159 subcutaneous edema in the ventral aspect of the cervical region, diffuse petechiae in the  
160 thymus, and paintbrush hemorrhages in the serosa/adventitia of the intra-abdominal  
161 segments of the umbilical arteries, suggesting that the fetus was alive until shortly  
162 before expulsion. A moderate amount of red-tinged serous fluid was present in the  
163 abdominal, thoracic, and pericardial cavities.

164 Scattered throughout both kidneys there were numerous discrete pinpoint red  
165 foci with a widespread distribution alternating with areas of pallor that were visible  
166 from the capsular surface (Fig 1A), which on cut section corresponded with enhanced  
167 cortical and medullary rays in the renal parenchyma. The liver had multifocally  
168 extensive areas of roughness and white pale discoloration visible from the

169 diaphragmatic capsular surface. On cut section, the underlying hepatic parenchyma had  
170 increased consistency and enhanced reticular pattern characterized by numerous  
171 pinpoint pale grayish foci and interconnected linear streaks with poorly distinct borders  
172 of approximately 1 mm width alternating with reddish-orange areas of the hepatic  
173 parenchyma, resembling the so-called “nutmeg liver” (Fig 2A).

174

#### 175 Histopathology and immunohistochemistry

176         The most striking microscopic lesions were in the kidneys and included severe  
177 widespread tubulointerstitial nephritis affecting predominantly the renal cortex but also  
178 the medulla (Fig 1B-D). Affected tubules were variably ectatic, frequently contained  
179 necrotic eosinophilic cellular debris sloughed into their lumens and were lined by  
180 attenuated epithelium. Multifocally, tubular epithelial cells showed either tumefaction  
181 with swollen and vesicular nuclei frequently containing one or several round or  
182 pleomorphic basophilic viral inclusion bodies, or were shrunken with angular cell  
183 borders, hypereosinophilic cytoplasm, and pyknotic nucleus or karyorrhectic debris. In  
184 affected areas, the interstitium was multifocally infiltrated by large numbers of  
185 lymphocytes, histiocytes, plasma cells, and rare neutrophils, or expanded by spindle  
186 cells with an elongate nucleus (fibroblasts) embedded in an eosinophilic fibrillar  
187 collagenous extracellular matrix, consistent with fibroplasia.

188         In the liver, the histoarchitecture was distorted, the hepatic cords were  
189 multifocally disorganized and separated by interconnecting bands of connective tissue  
190 (dissecting fibrosis), which also mildly expanded the portal tracts and surrounded some  
191 centrilobular veins. There was multifocal random lymphocytic and histiocytic hepatitis



192 with rare neutrophils, multifocal individual hepatocellular death (necrosis or apoptosis),  
193 and multifocal mild to moderate portal hepatitis (Fig 2B-D).

194 Other less severe lesions included mild multifocal infrequent gliosis in the brain  
195 with rare perivascular and leptomeningeal lymphocytic infiltrates, and mild  
196 megakaryocyte hyperplasia (suggestive of extramedullary hematopoiesis) in the spleen.  
197 No significant lesions were observed in the other examined tissues (see the Materials  
198 and Methods section for a list of examined tissues).

199 Based on the abundance of intranuclear viral inclusion bodies in the kidney, and  
200 the presence of severe histologic lesions in the liver, these two tissues were selected to  
201 perform immunohistochemical assays. The assay using a mouse monoclonal antibody  
202 raised against Simian Virus-40 (SV-40, *Macaca mulatta polyomavirus-1*,  
203 *Betapolyomavirus macacae*) large tumor (LT) antigen revealed abundant strong  
204 granular immunoreactivity in the kidney that was largely restricted to the renal tubules  
205 in both the cortex and medulla and was more intense in the nuclei of the epithelial cells  
206 (Fig 1E-F). No polyomavirus antigen was detected in a section of liver. The  
207 immunohistochemical assays for the detection of herpesviruses and adenoviruses were  
208 negative in the kidney and liver.

209

210 Transmission electron microscopy

211 Transmission electron microscopy evaluation revealed abundant electron-dense  
212 viral particles morphologically consistent with polyomavirus in the nuclei of renal  
213 tubular epithelial cells (Fig 3). Viral particles measuring between 35 and 43 nm in  
214 diameter were arranged in icosahedral arrays, creating inclusions within the nuclei.

215

216 Molecular virology and ancillary testing for specific pathogens

217           The polyomavirus VP1 fragment was successfully amplified from kidney, liver,  
218 and brain tissues by real-time polymerase chain reaction (PCR) with Ct values of 6.3,  
219 14.8, and 19.9, respectively. Furthermore, a VP1 gene partial sequence (527 bp),  
220 amplified by conventional PCR and sequenced, confirmed the presence of BoPyV-1.  
221 PCRs for bovine herpesvirus-1, -4, and -5, and for bovine viral diarrhea virus (*Pestivirus*)  
222 were all negative. PCR for *Neospora caninum* was positive in the brain and negative in  
223 the kidney and liver. Real-time PCR for pathogenic *Leptospira* spp. was negative in the  
224 kidney and liver.

225

226 Whole genome sequencing and genome characterization

227           The complete BoPyV-1 genome assembly obtained in this work consisted of  
228 4,697 bp and was assembled from 4,712 Oxford Nanopore Technology long reads with  
229 an average length of 1,248 bp and 1,090X coverage (S1 Fig). The complete genome  
230 sequence, named BoPyV-1/Faber/2021/Uy, was deposited in GenBank with accession  
231 number OM938033. The nucleotide composition was 28.7%, 21.2%, 29.9%, and 20.1%  
232 of A, C, T, and G, respectively. The genomic organization was similar to that of other  
233 BoPyV-1 reported genomes, with an early coding region containing ORFs encoding two  
234 proteins (LT antigen and small T –ST– antigen) and a late coding region containing  
235 ORFs that encode 3 structural proteins (VP1, VP2, and VP3) and a viral agnoprotein  
236 (Fig 4).

237

238 Phylogenetic analyses

239           The current classification system of polyomaviruses is based on the LT antigen  
240 amino acid sequence analysis. Based on this, we classified BoPyV-1/Faber/2021/Uy  
241 within the *Epsilonpolyomavirus* genus, closely related to other BoPyV-1 which is  
242 currently named *Epsilonpolyomavirus bovis* (Fig 5A). We also performed additional  
243 analyses to deepen the phylogenetic description of this fetopathogenic strain. Based on  
244 the phylogenetic analysis using complete genomes, BoPyV-1/Faber/2021/Uy grouped  
245 with other BoPyV-1 sequences, closely related to D13942 and KM496323 strains (Fig  
246 5B). Similar results were observed when the analyses were performed using LT antigen,  
247 ST antigen, VP1, VP2, and VP3, with nucleotide and amino acid sequences; BoPyV-  
248 1/Faber/2021/Uy was also closely related to other *Epsilonpolyomavirus bovis* (S2 Fig).

249

#### 250 Sequence identity

251           At the nucleotide level (Table 1), based on the complete genome, LT antigen, ST  
252 antigen, VP1, and VP3, BoPyV-1/Faber/2021/Uy showed the highest similarity (99.3%,  
253 99.3%, 99.7%, 99.3%, and 99.2%, respectively) to D13942, ranging between 93.6% and  
254 99.7% to other *Epsilonpolyomavirus bovis* (BoPyV-1). In the ST antigen and VP3  
255 genes, BoPyV-1/Faber/2021/Uy also shared the same highest similarity (99.7% and  
256 99.2%, respectively) with KM496323. Based on the VP2 gene, BoPyV-  
257 1/Faber/2021/Uy was most similar to KU200259 (99.3%), varying between 97.0% and  
258 99.3% from other *Epsilonpolyomavirus bovis* (BoPyV-1). The nucleotide similarity  
259 ranged between 26.5% and 55.0% to BoPyV-2, and 26.7% and 48.3% to BoPyV-3.

260

261 Table 1. Comparison between BoPyV-1/Faber/2021/Uy and members of the  
 262 *Epsilonpolyomavirus bovis* (BoPyV-1), BoPyV-2, and BoPyV-3 at the nucleotide and  
 263 amino acid levels.

|                               |                 | <i>Epsilonpolyomavirus bovis</i><br>(BoPyV-1) |            | BoPyV-2    |            | BoPyV-3    |            |
|-------------------------------|-----------------|-----------------------------------------------|------------|------------|------------|------------|------------|
|                               |                 | Nucleotide                                    | Amino acid | Nucleotide | Amino acid | Nucleotide | Amino acid |
| BoPyV-<br>1/Faber/2021/U<br>y | Complete genome | 93.6–99.3                                     | -          | 40.0–41.0  | -          | 37.6       | -          |
|                               | Large T antigen | 93.8–99.3                                     | 94.1–99.6  | 36.1–37.5  | 30.3–31.6  | 48.3       | 36.9       |
|                               | Small T antigen | 99.2–99.7                                     | 98.3–99.1  | 26.5–28.9  | 15.7–17.1  | 26.7       | 18.2       |
|                               | VP1             | 97.1–99.3                                     | 98.6–99.7  | 53.7–55.0  | 50.5–52.2  | 39.7       | 27.5       |
|                               | VP2             | 97.0–99.3                                     | 96.8–99.7  | 31.0–32.1  | 23.7–25.1  | 31.8       | 16.4       |
|                               | VP3             | 96.1–99.2                                     | 96.1–100   | 36.1–37.7  | 20.6–22.1  | 30.1       | 13.0       |

264

265 At the amino acid level (Table 1), based on the LT antigen, ST antigen, VP1,  
 266 and VP2 proteins, BoPyV-1/Faber/2021/Uy was most similar (99.6%, 99.1%, 99.7%  
 267 and 99.7%, respectively) to D13942, varying between 94.1% and 99.7% to other  
 268 *Epsilonpolyomavirus bovis* (BoPyV-1). In the VP1 protein BoPyV-1/Faber/2021/Uy  
 269 also shared the same highest similarity (99.7%) with KU170643. Based on the ST  
 270 antigen and VP2 proteins, BoPyV-1/Faber/2021/Uy was equally similar (99.1% and  
 271 99.7%, respectively) to all the other *Epsilonpolyomavirus bovis* (BoPyV-1) except  
 272 KU200259 and KX455485, respectively. Lastly, based on the VP3 protein, BoPyV-  
 273 1/Faber/2021/Uy showed 100% similarity with the other *Epsilonpolyomavirus bovis*  
 274 (BoPyV-1) except KX455485 (96.1%). The amino acid identity of BoPyV-  
 275 1/Faber/2021/Uy ranged between 15.7% and 52.2% to members of the BoPyV-2, and  
 276 13.0% and 36.9% to BoPyV-3.

277

278 Virus isolation

279           Cytopathic effect characterized by cytoplasmic vacuolation followed by lysis of  
280   Madin-Darby bovine kidney (MDBK) cells was observed 5 days after inoculation of the  
281   kidney tissue, and 4 and 5 days after inoculation of the supernatants on the two (first  
282   and second) serial passages (Fig 6A). The real-time PCR for BoPyV-1 on aliquots of the  
283   supernatant obtained at 5-, 4- and 5-days post-inoculation was positive with Ct values of  
284   9.6, 13.2, and 14.3, respectively, demonstrating BoPyV-1 replication. No cytopathic  
285   effect was observed at the same time points in any of the MDBK cell cultures used as  
286   negative controls (Fig 6B).

287

## 288   **Discussion**

289           Here we describe for the first time gross and microscopic lesions in an aborted  
290   bovine fetus infected with BoPyV-1, providing evidence of its pathogenicity under  
291   nonexperimental conditions in its natural host.

292           Altogether, the pathological (histological, immunohistochemical, ultrastructural)  
293   findings in the kidneys of the fetus are consistent with an active polyomavirus infection  
294   with lytic replication of the virus, production of abundant intranuclear inclusion bodies  
295   composed of dense arrays of assembled virions, and LT antigen expression in the nuclei  
296   of renal tubular epithelial cells. In addition, severe degeneration (i.e., swelling,  
297   tumefaction, attenuation) and necrosis of renal tubular epithelial cells are indicative of a  
298   cytopathic viral effect, along with a prominent inflammatory response to the infection,  
299   and interstitial fibrosis suggestive of chronic active renal damage at the time of abortion.  
300   While BoPyV-1 was isolated and detected by molecular methods as well as  
301   intralesionally by immunohistochemistry and transmission electron microscopy, other  
302   DNA viruses able to produce intranuclear inclusion bodies in epithelial cells such as

303 herpesviruses and adenoviruses were ruled out in this case. Although BoPyV-1 had  
304 been previously detected in aborted bovine fetuses [26], the study did not include a  
305 pathologic examination of the fetuses, and the authors considered BoPyV-1 an unlikely  
306 cause of abortion. Conversely, we provide evidence to consider that BoPyV-1 is  
307 fetopathogenic in its natural host. Elucidating whether the clinical manifestation of  
308 abortion resulted from BoPyV-1-induced pathology in the fetus needs further  
309 investigation, although based on the evidence provided herein, BoPyV-1 should be  
310 considered a probable cause of abortion in cattle.

311         Although the pathogenic mechanisms by which most polyomaviruses induce  
312 tissue damage are not yet fully understood, five patterns of polyomavirus-induced  
313 pathology have been proposed [27]. These include: 1)- cytopathic polyomavirus  
314 pathology pattern, 2)- cytopathic-inflammatory pathology pattern, 3)- immune-  
315 reconstitution inflammatory syndrome, 4)- autoimmune polyomavirus pathology  
316 pattern, and 5)- oncogenic polyomavirus pathology pattern. The cytopathic  
317 polyomavirus pathology pattern is characterized by uncontrolled viral replication in the  
318 infected cells without significant inflammation; PML caused by JCPyV replication in  
319 the oligodendrocytes is the prototype disease for this pattern. The cytopathic-  
320 inflammatory pathology pattern is characterized by high-level virus replication with  
321 cytopathic lysis of infected cells along with necrosis and a significant inflammatory  
322 response. PyVAN in kidney allografts is the prototype disease for this pattern [27]. The  
323 lesions in the kidneys of the aborted fetus described herein best fit with this latter  
324 pattern of polyomavirus-induced pathology.

325         Histologically, PyVAN in humans is characterized by varying degrees of  
326 multifocal random interstitial nephritis, tubulitis, cytopathic changes and basophilic  
327 intranuclear inclusions in renal epithelial cells, interstitial fibrosis, and tubulo-interstitial

328 atrophy, depending on the stage of disease progression [28]. Interestingly, these same  
329 lesions were observed in the kidneys of the aborted fetus infected with BoPyV-1. The  
330 resemblance in the type of renal lesions suggests that BoPyV-1 in cattle could  
331 potentially be a natural model of PyVAN, although this possibility needs to be further  
332 explored.

333         Immunohistochemistry using antibodies against SV-40 LT antigen, as in this  
334 report, has been shown to cross-react with other polyomaviruses such as BKPyV and  
335 JCPyV in cases of PyVAN in humans [29]. In concert with this, the antibody we used  
336 cross-reacted with BoPyV-1, indicating that this test can be used for viral identification  
337 in formalin-fixed paraffin-embedded bovine tissues. This is not unexpected, considering  
338 that LT antigen has domains that are conserved among the polyomaviruses [1].  
339 However, the LT antigen amino acid sequence identity between SV-40 and BoPyV-  
340 1/Faber/2021/Uy is only 37.4% (data not shown), although the similarity within the  
341 recognition sites of the antibodies (epitopes) may be higher.

342         The lesions observed in the hepatic parenchyma of the aborted fetus, including  
343 hepatocellular damage (i.e., scattered individual hepatocellular necrosis/apoptosis),  
344 inflammation, and fibrosis, are attributable to a chronic active infection. Although we  
345 were unable to clearly identify viral inclusions histologically or viral LT antigen by  
346 immunohistochemistry in the liver, real-time PCR results indicate that the viral genome  
347 was present in this tissue. Not finding viral inclusions nor antigen could be due to a  
348 lower limit of detection of these pathologic techniques compared to real-time PCR, or to  
349 a possible multifocal patchy distribution of the virus in the hepatic parenchyma. The  
350 real-time PCR Ct value found in the liver (14.8) would indicate a relatively high viral  
351 load in this tissue, though much lower than the one found in the kidney (Ct = 6.3). The  
352 molecular detection of the virus in the liver is consistent with the previous study from

353 Belgium, in which kidney was not tested but BoPyV-1 was detected in other fetal  
354 tissues (and fluids), including liver [26]. Our results indicate that the viral load is higher  
355 in the kidneys, where the virus can not only be detected by real-time PCR but also  
356 visualized by routine histopathology. Whether BoPyV-1 infects and replicates in other  
357 fetal tissues should be explored in future research.

358 Interestingly, histologic examination of the brain of the fetus revealed mild  
359 multifocal infrequent gliosis with rare perivascular and leptomeningeal lymphocytic  
360 infiltrates. These lesions were mild, infrequent, and likely incidental (sublethal). Given  
361 that the fetus was coinfecting with *Neospora caninum*, as determined by PCR  
362 amplification of DNA of this protozoan parasite from the fetal brain, these brain lesions  
363 could be attributed to *N. caninum* infection. While *N. caninum* is a common  
364 abortifacient of cattle, abortions caused by this protozoan usually have typical and  
365 severe lesions that include multifocal encephalic necrosis along with gliosis and/or  
366 inflammation of the cerebral parenchyma, and extensive non-suppurative myocarditis  
367 and/or skeletal myositis [30], which were not present in this fetus. Hence, we believe  
368 that, while the mild brain lesions in the fetus could have been caused by this protozoan,  
369 other lesions typically found in fetuses aborted because of *N. caninum* infection were  
370 lacking. Multifocal mild cerebral gliosis and perivascular or leptomeningeal  
371 inflammation in the brain is occasionally present as an incidental (sublethal) finding in  
372 asymptomatic bovine neonates that are born congenitally infected with *N. caninum* or  
373 non-aborted infected fetuses recovered at slaughter [30,31,32]. Interestingly, somewhat  
374 similar lesions including gliosis and perivascular lymphocytic encephalitis have been  
375 recently described in two adult dairy cows infected with BoPyV-2 [20]. Considering  
376 that BoPyV-1 was detected in the brain of the fetus by real-time PCR, although with a  
377 higher Ct (19.9) indicating a lower viral load than in the kidney and liver, the



378 contribution of the virus in the development of these cerebral lesions should not be  
379 disregarded. However, whether BoPyV-1 contributed to these cerebral lesions, or  
380 whether *N. caninum* contributed to the clinical presentation of abortion remains under  
381 speculation. Of note, *N. caninum* PCR was negative in the fetal kidney and liver,  
382 suggesting that this parasite did not contribute to the lesions observed in these tissues.

383         Generally, occurrence and progression of diseases caused by polyomaviruses in  
384 mammals seem to be largely dependent on host immunosuppression [1,2]. Whether the  
385 cow or aborted fetus in this report were immunosuppressed is unknown. There was no  
386 evidence of lymphoid depletion on histologic examination of lymphoid tissues  
387 including thymus, spleen, and lymph nodes in the aborted fetus. Bovine viral diarrhea  
388 virus (*Pestivirus*), a common immunosuppressive virus of cattle, was ruled out by  
389 reverse transcriptase PCR in the fetal tissues. Additionally, *Leptospira* spp. infection,  
390 which can also cause bovine abortion with fetal renal and hepatic lesions, was ruled out  
391 by real-time PCR in the kidney and liver.

392         Little information is available on the epidemiology and geographic distribution  
393 of BoPyVs. An early serologic study found that 62% of 273 cattle had antibodies  
394 against the virus [17], suggesting a relatively high seroprevalence. Based on the  
395 authors' affiliations, we speculate that the tested cattle were from the United Kingdom.  
396 Similarly, a research group from The Netherlands found antibodies to the virus in sera  
397 of 25 out of 57 cattle tested (43.9%) as well as in 6/26 (23.1%) samples of bovine  
398 colostrum [8]. A study from New Zealand found that infection is more common in  
399 bovine fetuses and calves than in adult cattle when batches of bovine serum products are  
400 analyzed [14]. Studies based on molecular detection in bovine serum, beef muscle, or  
401 ground beef in the USA, Mexico, Germany, and New Zealand found DNA of BoPyV-1,  
402 -2, and/or -3 in 2–70% of the tested samples [14,15,19,33,34]. Molecular detection of

403 BoPyV-1 and/or -2 has also been documented in cattle in Spain [35], Belgium [26], and  
404 Switzerland [20]. BoPyV has also been identified as an environmental contaminant in  
405 Spain [36,37], Greece, Hungary, Sweden, and Brazil [36]. The name of the initial  
406 polyomavirus isolated from cattle designated WRSV suggests that this virus may have  
407 been isolated in Wokalup Research Station in Australia [16]. Our report broadens the  
408 current knowledge on the geographic distribution of BoPyV-1 to Uruguay. Although the  
409 available information is somewhat limited, BoPyVs seem to have a broad geographic  
410 distribution.

411 In this work, we sequenced the whole genome of the involved BoPyV-1, which  
412 to the best of our knowledge, represents the first available genome from the Southern  
413 Hemisphere. However, we note that one of the BoPyV-1 complete genomes available in  
414 GenBank (D13942) lacks data on its geographic origin, information that is also missing  
415 in the original publications describing this isolate and sequence by researchers from The  
416 Netherlands [8,18]. The genome of all known polyomaviruses encodes at least two  
417 regulatory proteins, namely LT and ST antigens, and two structural proteins, the major  
418 capsid protein VP1 and the minor capsid protein VP2 [1]. A third capsid protein (VP3)  
419 is encoded by most polyomaviruses. Similar to other members of the *Polyomaviridae*  
420 family such as BKPyV and JCPyV, BoPyV-1 also encodes the regulatory protein  
421 agnoprotein which is required for efficient viral proliferation. Accordingly, BoPyV-  
422 1/Faber/2021/Uy genome encodes all the previously mentioned proteins.

423 Phylogenetic analyses revealed a close relationship of BoPyV-1/Faber/2021/Uy  
424 to other BoPyV-1, particularly with the first complete genome released in GenBank  
425 (D13942) [18]. This close relationship was also observed in the analyses of sequence  
426 identity, in which BoPyV-1/Faber/2021/Uy showed an identity higher than 99% to  
427 D13942 when comparing the complete nucleotide sequence and also at both the

428 nucleotide and amino acid level. It is worth mentioning a particular event that was  
429 observed in the ST antigen gene, where isolate H8 (KX455485) does not present a  
430 proper coding sequence of this gene, as observed in 55% of the reads composing the  
431 BoPyV-1/Faber/2021/Uy genome. This event is caused by a T/A substitution that  
432 generates a stop codon, which may indicate that the ST antigen is not essential for virus  
433 replication and disease. It should not be overlooked that this substitution in 55% of the  
434 reads could represent a sequencing artifact.

435         Despite not being an objective of this work, based on the obtained results and the  
436 latest release of the ICTV classification system by the *Polyomaviridae* Study Group, we  
437 propose to assign BoPyV-2 and BoPyV-3 in the genera and species *Alphapolyomavirus*  
438 *secubovis* and *Deltapolyomavirus tertibovis*, respectively.

439         Finally, we isolated the BoPyV-1 infecting this fetus from a frozen sample of  
440 kidney. Based on the results of the histologic and ultrastructural examinations, as well  
441 as immunohistochemistry, which indicated active viral replication in renal tubular  
442 epithelial cells, we elected to attempt virus isolation on MDBK cells as they are  
443 epithelial cells of bovine kidney origin. Surprisingly, under the conditions we described  
444 (see section on materials and methods), cytopathic effect was evident 4-5 days after  
445 inoculating the cells with either the fetal kidney that had been kept frozen for nearly 1  
446 year, or the supernatants of the first and second passages. Concurrently, high BoPyV-1  
447 loads were identified in the culture supernatants, as determined by the low real-time  
448 PCR Ct values. Altogether the results indicate that BoPyV-1 remains viable for long  
449 periods under freezing, as expected for a non-enveloped single stranded DNA virus, and  
450 that this strain may have a high replication capacity, considering that BoPyV-1 has been  
451 regarded as a relatively slow growing virus, requiring at least 3 to 5 weeks before *in*  
452 *vitro* virus replication is detected by qPCR [13,38].

453           We conclude that BoPyV-1 is pathogenic to the bovine fetus and thus a probable  
454    cause of abortion in cattle. Pathogenicity seems to involve cytopathic viral effects with  
455    tissue damage including necrosis, inflammation, and fibrosis, with lesions resembling  
456    PyVAN in humans. Factors of the virus and host that would determine pathology and  
457    disease development, as well as the epidemiology and transmission routes, and zoonotic  
458    potential need further investigation. *In vitro* and *in vivo* studies, including experimental  
459    infections in laboratory animals and livestock using the BoPyV-1 strain isolated from  
460    this fetus would help to better understand the biology and clinical relevance of this  
461    virus.

462

## 463    **Materials and Methods**

### 464    Histopathology and immunohistochemistry

465           Samples of brain, kidney, liver, heart, spleen, lung, trachea, esophagus, tongue,  
466    skeletal muscle, eyelid/conjunctiva, lymph node, adrenal gland, abomasum,  
467    forestomachs, thymus, testicle, and small and large intestines were immersion-fixed in  
468    10% neutral buffered formalin, processed, embedded in paraffin, microtome-sectioned  
469    and stained with hematoxylin and eosin for histopathology at INIA`s veterinary  
470    laboratory. Sections were examined by a veterinary pathologist under an optical  
471    microscope (Axio Scope.A1, Carl Zeiss, Germany) coupled with a color digital camera  
472    (Axiocam 512, Carl Zeiss, Germany) commanded by the ZEN software (Carl Zeiss,  
473    Germany).

474           Sections of liver and kidney were processed by immunohistochemical assays for  
475    the detection of viruses known to produce intranuclear inclusion bodies in epithelial  
476    cells, including polyomavirus, herpesvirus, and adenovirus. For polyomavirus, tissues

477 were subjected to heat-induced epitope retrieval in citrate buffer, and a mouse  
478 monoclonal antibody raised against Simian Virus-40 (SV-40, *Macaca mulatta*  
479 *polyomavirus-1*, *Betapolyomavirus macacae*) LT antigen (CalBiochem®, Clone  
480 PAb416, Sigma-Aldrich) was used as primary antibody at a 1:200 dilution. Colorimetric  
481 detection of linked antibodies was performed using the Mach 4 AP Polymer kit (Biocare  
482 Medical, Concord, CA, USA) followed by the visualization with Permanent Red  
483 Chromogen (Cell Marque™, Millipore-Sigma-Aldrich, Rockling, CA, USA). Slides  
484 were counterstained with Mayer's hematoxylin (Poly Scientific, Bay Shore, NY, USA)  
485 and coverslipped with aqueous mounting medium (Polysciences, Inc.).

486 Two immunohistochemical assays were performed for the detection of  
487 herpesviruses. For one, antigen retrieval was accomplished by treatment with proteinase  
488 K, and a rabbit polyclonal antibody raised against human herpesvirus-1 (CDC  
489 Biological Products) that cross-reacts with human herpesvirus-2 was applied at a  
490 dilution of 1:3,000. The same revealing system as described for the SV-40  
491 immunohistochemistry was used. The other assay was performed as previously  
492 described [39] using a primary antibody against bovine herpesvirus-1.

493 For adenovirus immunohistochemistry, antigen retrieval was accomplished by  
494 treatment with 0.4% pepsin and a primary antibody raised against deer adenovirus that  
495 cross-reacts with bovine adenovirus was applied. This assay was performed following a  
496 previously described procedure [40] with minor modifications (the Dako Envision +  
497 system, rather than the Biocare Farma, was used as the detection system).

498 For each of the immunohistochemical assays, appropriate positive and negative  
499 controls were used in parallel for quality assurance purposes and identification of  
500 nonspecific immunoreactions. The immunohistochemical assays for polyomavirus and  
501 human herpesvirus-1 were conducted at the Centers for Diseases Control and

502 Prevention (CDC), while the assays for bovine herpesvirus-1 and adenovirus were  
503 conducted at the California Animal Health and Food Safety laboratory (University of  
504 California, Davis).

505

506 Transmission electron microscopy

507 Transmission electron microscopy was conducted in formalin-fixed paraffin-  
508 embedded sections of kidney, using the on-slide embedding method [41] at the CDC.  
509 Briefly, 4 µm thick sections of tissue affixed to glass slides were deparaffinized in  
510 xylene, then rehydrated and fixed in 2.5% buffered glutaraldehyde. Samples were post  
511 fixed with 1% osmium tetroxide, *en bloc* stained with uranyl acetate, dehydrated, and  
512 embedded in Epon-Araldite resin. Epoxy resin-embedded glass slide sections were  
513 immersed in boiling hot water, removed from the slides with a razor blade, and areas of  
514 interest were glued onto EM blocks. Ultrathin sections were stained with uranyl acetate  
515 and lead citrate and examined on a Thermo Fisher/ FEI Tecnai BioTwin electron  
516 microscope.

517

518 Molecular virology and ancillary testing for specific pathogens

519 Nucleic acids were extracted from kidney, liver, and brain samples from the  
520 aborted bovine fetus, using the MagMAX™ CORE Nucleic Acid Purification Kit  
521 (Thermo Fisher Scientific) at INIA. The extracted nucleic acids were initially processed  
522 by PCR for the detection of bovine herpesviruses-1, -4, and -5 [42,43] and reverse-  
523 transcriptase PCR for bovine viral diarrhea virus (*Pestivirus*) [44,45] at “Universidad de  
524 la República” (UdelaR), and PCR for *Neospora caninum* [46] at INIA. DNA extracted

525 from kidney and liver was also tested by a real-time PCR assay targeting the *lipL32*  
526 gene of pathogenic *Leptospira* spp. [47] at INIA.

527 For polyomavirus detection, real-time PCR targeting a 77 bp fragment of the  
528 VP1 gene was performed as described elsewhere [48] at UdelaR. Briefly, 12.5  $\mu$ L of  
529 SensiFAST Probe No-ROX Kit (Bioline®, London, UK), 5.0  $\mu$ L of nuclease-free water,  
530 1.0  $\mu$ L of 10  $\mu$ M forward primer (QB-F1-1), 1.0  $\mu$ L of 10  $\mu$ M reverse primer (QB-R1-  
531 1), 0.5  $\mu$ L of 10  $\mu$ M probe (QB-P1-2), and 5  $\mu$ L of DNA were mixed in 0.2-mL PCR  
532 tubes.

533 A partial VP1 gene sequence (527 bp) was amplified from the DNA by a  
534 conventional PCR at UdelaR. Briefly, 12.5  $\mu$ L of MangoMix™ (Bioline®, London,  
535 UK), 4.5  $\mu$ L of nuclease-free water, 1.0  $\mu$ L of 10  $\mu$ M forward primer (VP1-F), 1.0  $\mu$ L  
536 of 10  $\mu$ M reverse primer (VP1-R), 1.0  $\mu$ L of dimethyl sulfoxide, and 5  $\mu$ L of cDNA  
537 were mixed in 0.2-mL PCR tubes. Primers and PCR conditions were previously  
538 described [14]. The PCR product was visualized in 2% agarose gel, purified using  
539 PureLink™ Quick Gel Extraction kit and PCR Purification Combo Kit (Invitrogen), and  
540 sequenced at Macrogen Inc. (Seoul, South Korea) with Sanger technology.

541

542 Whole-genome sequencing and genome characterization

543 For BoPyV whole-genome sequencing, conducted at UdelaR, viral genomic  
544 DNA was purified from the whole genomic DNA from kidney by extracting the 4–6 kb  
545 region of a 1% agarose gel. DNA purity, integrity, and concentration were assessed with  
546 a Qubit device (Thermo Fisher Scientific). The sequencing library was prepared with  
547 the ligation sequencing kit (SQK-LSK109) following the manufacturer's instructions  
548 and directly sequenced on a FLO-MIN106 flow cell in a MinION device (Oxford

549 Nanopore Technologies®, Oxford, UK) for 24 h. High-accuracy basecalling was  
550 performed with Guppy v3.6.0, and reads were trimmed and filtered with Nanofilt and  
551 Nanoplot [49]. Reads with quality over 10 were used in further analyses. A host  
552 filtering step was done by mapping clean reads to the *Bos taurus* reference genome  
553 (GCF\_002263795.1\_ARS-UCD1.2\_genomic.fna) using Minimap2 [50]. Unmapped  
554 reads were then mapped against the BoPyV-1 reference genome (NC\_001442) and the  
555 consensus sequence was obtained using SAMtools [51]. The obtained complete genome  
556 sequence was deposited in GenBank. Genome annotation was performed using the  
557 BoPyV-1 reference genome (NC\_001442).

558

#### 559 Phylogenetic analyses

560 To classify the BoPyV, a phylogenetic tree was performed using LT antigen  
561 amino acid sequences. Representative sequences of all the ICTV recognized genera, all  
562 the polyomavirus sequences of bovine origin available in GenBank and other  
563 *Epsilonpolyomavirus* genus sequences of non-bovine origin were used. For  
564 phylogenetic analysis of the complete genome, all the complete BoPyV genomes were  
565 retrieved from GenBank. Finally, all the available BoPyV sequences including LT  
566 antigen, ST antigen, VP1, VP2 and VP3 were used to perform additional phylogenetic  
567 trees with nucleotide and amino acid sequences, to deepen the molecular  
568 characterization.

569 Multiple sequence alignments were performed with Clustal Omega provided at  
570 the EMBL-EBI [52-Madeira et al., 2019]. The evolutionary model for the data and a  
571 maximum-likelihood phylogenetic tree were inferred with W-IQTREE [53]. Branch  
572 support was estimated with the approximate likelihood-ratio test (1,000 replicates) [54].



573

574 Sequence identity

575 The alignments for complete genomes and of each individual gene and protein  
576 were used to obtain the sequence identity matrices with BioEdit version 7.2.6 [55].

577

578 Virus isolation

579 A sample of fetal kidney stored in a freezer at -20°C for nearly 1 year was  
580 thawed and processed for virus isolation at UdelaR. Briefly, 20 mg of sample were  
581 inoculated on MDBK cells cultured in a sterile 24-well cell culture plate (Costar™,  
582 Corning Inc.) with Dulbecco's minimum essential medium supplemented with 1%  
583 penicillin/streptomycin solution and 5% commercial gamma-irradiated fetal bovine  
584 serum (Sigma-Aldrich, USA). Cultures were kept at 37°C in an atmosphere with 5%  
585 CO<sub>2</sub> and observed daily under inverted microscope to search for cytopathic effect. Five  
586 days post-inoculation of the kidney, 100 µL of the supernatant was inoculated onto a  
587 new sterile plate with the same cell line, that was similarly cultured and observed daily  
588 for cytopathic effect (first passage). A second passage was performed by inoculating  
589 100 µL of the supernatant obtained at 4 days post-inoculation from the first passage into  
590 a new plate that was similarly cultured and observed daily for cytopathic effect. Each  
591 passage was performed in triplicates, observing a cytopathic effect in each of the  
592 replicates. At the same time, uninfected cells were seeded onto wells in each of the  
593 plates as control of the cell culture and reagents. Aliquots of the supernatant obtained  
594 from each one of the three culture plates at 5-, 4-, and 5-days post-inoculation were  
595 processed for DNA extraction and BoPyV-1 qPCR as described in the molecular  
596 virology section.

597

598 **Acknowledgements**

599 We thank Eduardo Vidal and Marcelo Pla from INIA for technical assistance, and the  
600 histology department, Karen Sverlow and Aníbal G. Armién from the California Animal  
601 Health and Food Safety (CAHFS) laboratory, University of California, Davis, for  
602 performing and reading the immunohistochemistry for bovine herpesvirus-1 and  
603 adenovirus.

604

605 **Disclaimer**

606 The findings and conclusions herein are those of the authors and do not necessarily  
607 represent the official position of the Centers for Disease Control and Prevention. The  
608 mention of company names or products does not constitute endorsement by the CDC.

609

610 **Funding**

611 This work was funded by grant PL\_27 N-23398 of the “Instituto Nacional de  
612 Investigación Agropecuaria” (INIA), Uruguay.

613

614 **Competing interests**

615 The authors declare that they have no competing interests regarding the publication of  
616 this manuscript.

617

618 **References**

- 619 1- Moens U, Krumbholz A, Ehlers B, Zell R, Johne R, Calvignac-Spencer S, et al.  
620 Biology, evolution, and medical importance of polyomaviruses: An update.  
621 Review Infect Genet Evol. 2017; 54: 18–38. doi: 10.1016/j.meegid.2017.06.011.
- 622 2- Imperiale MJ, Jiang M. Polyomavirus persistence. Annu Rev Virol. 2016; 3:  
623 517–532. doi: 10.1146/annurev-virology-110615-042226.
- 624 3- Feng H, Shuda M, Chang Y, Moore PS. Clonal integration of a polyomavirus in  
625 human Merkel cell carcinoma. Science, 2008; 319: 1096–1100. doi:  
626 10.1126/science.1152586.
- 627 4- Dela Cruz FN, Giannitti F, Li L, Woods LW, Del Valle L, Delwart E, et al.  
628 Novel polyomavirus associated with brain tumors in free-ranging raccoons,  
629 western United States. Emerg Infect Dis. 2013; 19: 77–84. doi:  
630 10.3201/eid1901.121078.
- 631 5- Giannitti F, Higgins RJ, Pesavento PA, Dela Cruz F, Clifford DL, Piazza M, et  
632 al. Temporal and geographic clustering of polyomavirus-associated olfactory  
633 tumors in 10 free-ranging raccoons (*Procyon lotor*). Vet Pathol. 2014; 51: 832–  
634 845. doi: 10.1177/0300985813502817.
- 635 6- Church ME, Estrada M, Leutenegger CM, Dela Cruz FN, Pesavento PA,  
636 Woolard KD. BRD4 is associated with raccoon polyomavirus genome and  
637 mediates viral gene transcription and maintenance of a stem cell state in  
638 neuroglial tumour cells. J Gen Virol. 2016; 97: 2939–2948. doi:  
639 10.1099/jgv.0.000594.
- 640 7- Reissig M, Kelly TJ, Daniel RW, Rangan ER, Shah KV. Identification of the  
641 stumptailed macaque virus as a new papovavirus. Infect Immun. 1976; 14: 225–  
642 231. doi: 10.1128/iai.14.1.225-231.1976.

- 643 8- Wognum AW, Sol CJA, van der Noordaa J, van Steenis G, Osterhaus ADME.  
644 Isolation and characterization of a papovavirus from cynomolgus macaque  
645 kidney cells. *Virology*. 1984; 134(1):254–257. doi: [10.1016/0042-](https://doi.org/10.1016/0042-6822(84)90293-9)  
646 [6822\(84\)90293-9](https://doi.org/10.1016/0042-6822(84)90293-9).
- 647 9- Parry JV, Richmond JE, Gardner SD. Polyomavirus in fetal rhesus monkey  
648 kidney cell lines used to grow hepatitis A virus. *Lancet*. 1983; 1(8331): 994. doi:  
649 [10.1016/s0140-6736\(83\)92121-9](https://doi.org/10.1016/s0140-6736(83)92121-9).
- 650 10- Parry JV, Lucas MH, Richmond JE, Gardner SD. Evidence for a bovine origin  
651 of the polyomavirus detected in foetal rhesus monkey cells, FRhK-4 and -6.  
652 *Arch Virol*. 1983; 78, 151–165. doi: [10.1007/BF01311311](https://doi.org/10.1007/BF01311311).
- 653 11- Schuurman R, van Steenis B, van Strien A, van der Noordaa J, Sol C. Frequent  
654 detection of bovine polyomavirus in commercial batches of calf serum by using  
655 the polymerase chain reaction. *J Gen Virol*. 1991; 72: 2739–2745. doi:  
656 [10.1099/0022-1317-72-11-2739](https://doi.org/10.1099/0022-1317-72-11-2739).
- 657 12- van der Noordaa J, Sol CJ, Schuurman R. Bovine polyomavirus, a frequent  
658 contaminant of calf sera. *Dev Biol Stand*. 1999; 99: 45–47. doi: [10.1016/s1045-](https://doi.org/10.1016/s1045-1056(05)80014-4)  
659 [1056\(05\)80014-4](https://doi.org/10.1016/s1045-1056(05)80014-4).
- 660 13- Nairn C, Lovatt A, Galbraith DN. Detection of infectious bovine polyomavirus.  
661 *Biologicals*. 2003; 31: 303–306. doi: [10.1016/j.biologicals.2003.08.005](https://doi.org/10.1016/j.biologicals.2003.08.005).
- 662 14- Wang J, Horner GW, O'Keefe JS. Detection and molecular characterisation of  
663 bovine polyomavirus in bovine sera in New Zealand. *N Z Vet J*. 2005; 53: 26–  
664 30. doi: [10.1080/00480169.2005.36465](https://doi.org/10.1080/00480169.2005.36465).
- 665 15- Paim WP, Maggioli MF, Falkenberg SM, Ramachandran A, Weber MN, Canal  
666 CW, et al. Virome characterization in commercial bovine serum batches—A

- 667 potentially needed testing strategy for biological products. *Viruses*, 2021; 13:  
668 2425, doi: 10.3390/v13122425.
- 669 16- Coackley W, Maker D, Smith VW. A possible bovine polyomavirus. *Arch*  
670 *Viol.* 1980; 66: 161–166. doi: doi.org/10.1007/BF01314984.
- 671 17- Parry JV, Gardner SD. Human exposure to bovine polyomavirus: A zoonosis?  
672 *Arch Virol.* 1986; 87: 287–296. doi: 10.1007/BF01315306.
- 673 18- Schuurman R, Sol C, van der Noordaa J. The complete nucleotide sequence of  
674 bovine polyomavirus. *J Gen Virol.* 1990; 71: 1723–1735. doi: 10.1099/0022-  
675 1317-71-8-1723.
- 676 19- Peretti A, FitzGerald PC, Bliskovsky V, Buck CB, Pastrana DV. Hamburger  
677 polyomaviruses. *J Gen Virol.* 2015; 96: 833–839. doi: 10.1099/vir.0.000033.
- 678 20- Hierweger MM, Koch MC, Seuberlich T. Bovine polyomavirus 2 is a probable  
679 cause of non-suppurative encephalitis in cattle. *Pathogens.* 2020; 9: 620. doi:  
680 10.3390/pathogens9080620.
- 681 21- Moens U, Van Ghelue M, Song X, Ehlers B. Serological cross-reactivity  
682 between human polyomaviruses. *Rev Med Virol.* 2013; 23: 250–264. doi:  
683 10.1002/rmv.1747.
- 684 22- Viscidi RP, Clayman B. Serological cross reactivity between polyomavirus  
685 capsids. *Adv Exp Med Biol.* 2006; 577:73–84. doi: 10.1007/0-387-32957-9\_5.
- 686 23- Clothier K. Anderson M. Evaluation of bovine abortion cases and tissue  
687 suitability for identification of infectious agents in California diagnostic  
688 laboratory cases from 2007 to 2012. *Theriogenology.* 2016; 85: 933–938. doi:  
689 10.1016/j.theriogenology.2015.11.001.

- 690 24- Wolf-Jäckel GA, Hansen MS, Larsen G, Holm E, Agerholm JS, Jensen TK.  
691 Diagnostic studies of abortion in Danish cattle 2015-2017. *Acta Vet Scand.*  
692 2020; 62: 1. doi: 10.1186/s13028-019-0499-4.
- 693 25- Dorsch MA, Cantón GJ, Driemeier D, Anderson ML, Moeller RB, Giannitti F.  
694 Bacterial, protozoal and viral abortions in sheep and goats in South America: A  
695 review. *Small Rum Res.* 2021; 205: 106547. doi:  
696 10.1016/j.smallrumres.2021.106547.
- 697 26- Van Borm S, Rosseel T, Behaeghel I, Saulmont M, Delooz L, Petitjean T, et al.  
698 Complete genome sequence of Bovine polyomavirus type 1 from aborted cattle,  
699 isolated in Belgium in 2014. *Genome Announc.* 2016; 4: e01646-15. doi:  
700 10.1128/genomeA.01646-15.
- 701 27- Dalianis T, Hirsch HH. Human polyomaviruses in disease and cancer. *Virology.*  
702 2013; 437: 63–72. doi: 10.1016/j.virol.2012.12.015.
- 703 28- Ramos E, Drachenberg CB, Wali R, Hirsch HH. The decade of polyomavirus  
704 BK-associated nephropathy: State of affairs. *Transplantation.* 2009; 87: 621–  
705 630. doi: 10.1097/TP.0b013e318197c17d.
- 706 29- Costa C, Cavallo R. Polyomavirus-associated nephropathy. *World J Transplant.*  
707 2012; 2: 84–94. doi: 10.5500/wjt.v2.i6.84.
- 708 30- Dubey JP, Hemphill A, Calero-Bernal R, Schares G. Neosporosis in animals. 1st  
709 ed. Boca Raton: CRC Press; 2017. doi: 10.1201/9781315152561.
- 710 31- Venturini MC, Venturini L, Bacigalupe D, Machuca M, Echaide I, Basso W, et  
711 al. *Neospora caninum* infections in bovine foetuses and dairy cows with  
712 abortions in Argentina. *Int J Parasitol.* 1999; 29: 1705–1708. doi:  
713 10.1016/s0020-7519(99)00143-5.

- 714 32- Bacigalupe D, Basso W, Caspe SG, Moré G, Lischinsky L, Gos ML, et al.  
715 *Neospora caninum* NC-6 Argentina induces fetopathy in both serologically  
716 positive and negative experimentally inoculated pregnant dams. *Parasitol Res.*  
717 2013; 112: 2585–2592. doi: 10.1007/s00436-013-3424-1.
- 718 33- Gräfe D, Ehlers B, Mäde D, Ellerbroek L, Seidler T, Johne R. Detection and  
719 genome characterization of bovine polyomaviruses in beef muscle and ground  
720 beef samples from Germany. *Int J Food Microbiol.* 2017; 241: 168–172. doi:  
721 10.1016/j.ijfoodmicro.2016.10.024.
- 722 34- Zhang W, Li L, Deng X, Kapusinszky B, Delwart E. What is for dinner? Viral  
723 metagenomics of US store bought beef, pork, and chicken. *Virology.* 2004; 468:  
724 303–310. doi: 10.1016/j.virol.2014.08.025.
- 725 35- Ben Salem N, Pérez de Val B, Martin M, Moens U, Ehlers B. Genome sequence  
726 of Bovine polyomavirus 1 detected in a Salers cow (*Bos taurus*) from Catalonia,  
727 Spain. *Genome Announc.* 2016; 4: e01658-15. doi: 10.1128/genomeA.01658-  
728 15.
- 729 36- Rusiñol M, Fernandez-Cassi F, Hundesa A, Vieira C, Kern A, Eriksson I, et al.  
730 Application of human and animal viral microbial source tracking tools in fresh  
731 and marine waters from five different geographical areas. *Water Res.* 2014; 59:  
732 119–129. doi: 10.1016/j.watres.2014.04.013.
- 733 37- Hundesa A, Maluquer de Motes C, Bofill-Mas S, Albinana-Gimenez N, Girones  
734 R. Identification of human and animal adenoviruses and polyomaviruses for  
735 determination of sources of fecal contamination in the environment. *Appl*  
736 *Environ Microbiol.* 2006; 72: 7886–7893. doi: 10.1128/AEM.01090-06.

- 737 38- Byrne P. The role of the large T antigen in the in vitro replication of BPyV. M.  
738 Sc. Thesis, University of Glasgow. 2009. Available from:  
739 <https://theses.gla.ac.uk/576/>
- 740 39- Rodger SM, Murray J, Underwood C, Buxton D. Microscopical and antigen  
741 distribution in bovine fetal tissues and placentae following experimental  
742 infection with bovine herpesvirus-1 during pregnancy. *J Comp Pathol.* 2007;  
743 137: 94–101. doi: 10.1016/j.jcpa.2007.04.022.
- 744 40- Woods LW, Schumaker BA, Pesavento PA, Crossley BM, Swift PK. Adenoviral  
745 hemorrhagic disease in California mule deer, 1990-2014. *J Vet Diagn Invest.*  
746 2018; 30: 530–573. doi: 10.1177/1040638718766036.
- 747 41- Martines RB, Ritter JM, Matkovic E, Gary J, Bollweg BC, Bullock H, et al.  
748 COVID-19 Pathology Working Group. Pathology and pathogenesis of SARS-  
749 CoV-2 associated with fatal coronavirus disease, United States. *Emerg Infect.*  
750 *Dis.* 2020; 26: 2005–2015. doi: 10.3201/eid2609.202095.
- 751 42- Ashbaugh SE, Thompson KE, Belknap EB, Schultheiss PC, Chowdhury S,  
752 Collins JK. Specific detection of shedding and latency of bovine herpesvirus 1  
753 and 5 using nested polymerase chain reaction. *J Vet Diagn Invest.* 1997; 9: 387–  
754 394. doi: 10.1177/104063879700900408.
- 755 43- Campos FS, Franco AC, Oliveira MT, Firpo R, Strelczuk G, Fontoura FE, et al.  
756 Detection of bovine herpesvirus 2 and bovine herpesvirus 4 DNA in trigeminal  
757 ganglia of naturally infected cattle by polymerase chain reaction. *Vet Microbiol.*  
758 2014; 171: 182–188. doi: 10.1016/j.vetmic.2014.03.012.
- 759 44- Maya L, Puentes R, Reolón E, Acuña P, Riet F, Rivero R, et al. Molecular  
760 diversity of bovine viral diarrhea virus in Uruguay. *Arch Virol.* 2016; 161: 529–  
761 535. doi: 10.1007/s00705-015-2688-4.



- 762 45- Vilček S, Herring AJ, Herring JA, Nettleton PF, Lowings JP, Paton DJ.  
763 Pestiviruses isolated from pigs, cattle and sheep can be allocated into at least  
764 three genogroups using polymerase chain reaction and restriction endonuclease  
765 analysis. *Arch Virol*. 1994; 136: 309–323. doi: 10.1007/BF01321060.
- 766 46- Cabrera A, Fresia P, Berná L, Silveira C, Macías-Rioseco M, Arevalo AP, et al.  
767 Isolation and molecular characterization of four novel *Neospora caninum*  
768 strains. *Parasitol Res*. 2019; 118: 3535–3524. doi: 10.1007/s00436-019-06474-9.
- 769 47- Stoddard RA, Gee JE, Wilkins PP, McCaustland K, Hoffmaster AR. Detection  
770 of pathogenic *Leptospira* spp. through TaqMan polymerase chain reaction  
771 targeting the LipL32 gene. *Diagn Microbiol Infect Dis*. 2009; 64: 247–255. doi:  
772 10.1016/j.diagmicrobio.2009.03.014.
- 773 48- Hundesa A, Bofill-Mas S, Maluquer de Motes C, Rodriguez-Manzano J, Bach  
774 A, Casas M, et al. Development of a quantitative PCR assay for the quantitation  
775 of bovine polyomavirus as a microbial source-tracking tool. *J Virol Methods*.  
776 2010; 163: 385–389. doi: 10.1016/j.jviromet.2009.10.029.
- 777 49- De Coster W, D’Hert S, Schultz D, Cruts M, Van Broeckhoven C. NanoPack:  
778 visualizing and processing long-read sequence data. *Bioinformatics*. 2018; 34:  
779 2666–2669. doi: 10.1093/bioinformatics/bty149.
- 780 50- Li H. Minimap2: pairwise alignment for nucleotide sequences. *Bioinformatics*.  
781 2018; 34: 3094–3100. doi: 10.1093/bioinformatics/bty191.
- 782 51- Li H, Handsaker B, Wysoker A, Fennell T, Ruan J, Homer N, et al. The  
783 sequence alignment/map format and SAMtools. *Bioinformatics*. 2009; 25:  
784 2078–2079. doi: 10.1093/bioinformatics/btp352

- 785 52- Madeira F, Park YM, Lee J, Buso N, Gur T, Madhusoondanan N, et al. The  
786 EMBL-EBI search and sequence analysis tools APIs in 2019. *Nucleic Acids*  
787 *Res.* 2019; 47(W1): W636–W641. doi: 10.1093/nar/gkz268.
- 788 53- Trifinopoulos J, Nguyen LT, von Haeseler A, Minh BQ. W-IQ-TREE: a fast  
789 online phylogenetic tool for maximum likelihood analysis. *Nucleic Acids Res.*  
790 2016; 44(W1): W232–W235. doi: 10.1093/nar/gkw256.
- 791 54- Anisimova M, Gascuel O. Approximate likelihood-ratio test for branches: A  
792 fast, accurate, and powerful alternative. *Syst Biol.* 2006; 55: 539–552. doi:  
793 10.1080/10635150600755453.
- 794 55- Hall TA. BioEdit: A user-friendly biological sequence alignment editor and  
795 analysis program for Windows 95/98/NT. *Nucl Acids Symp Ser.* 1999; 41: 95–  
796 98.

797

## 798 **Figure captions**

799 **Fig 1. Pathological findings in the kidney of the aborted fetus.** A- Grossly there are  
800 numerous discrete pinpoint red foci disseminated throughout the renal cortex that are  
801 visible through the capsular surface. B- Cortical tubules are variably ectatic, contain  
802 necrotic cellular debris and are lined by either attenuated epithelium, or epithelial cells  
803 with markedly swollen vesicular nuclei, occasionally containing one or several magenta  
804 intranuclear inclusion bodies. The cortical interstitium is infiltrated by inflammatory  
805 cells, predominantly lymphocytes and histiocytes. Hematoxylin and eosin (H&E) stain,  
806 original magnification 400X. C- Similar histologic lesions as described in B but there is  
807 also marked interstitial fibrosis. H&E stain, original magnification 400X. D- Numerous  
808 cortical tubular epithelial cells have markedly swollen nuclei containing one or several  
809 magenta intranuclear inclusion bodies surrounded by a clear halo (arrows), indicating

810 margination of the chromatin. H&E stain, original magnification 630X. E and F.  
811 Immunoreactivity to polyomavirus LT antigen is demonstrated by red chromogen  
812 precipitate largely in the nucleus of cortical tubular epithelial cells.  
813 Immunohistochemistry (immunoalkaline phosphatase technique) with a monoclonal  
814 primary antibody against SV-40 polyomavirus LT antigen, hematoxylin counterstain,  
815 original magnifications 200X (E) and 400X (F).  
816 **Fig 2. Pathological findings in the liver of the aborted fetus.** A- Cut section of the  
817 hepatic parenchyma showing an enhanced reticular pattern characterized by numerous  
818 pinpoint pale grayish foci and interconnected linear streaks alternating with reddish-  
819 orange areas of hepatic parenchyma (“nutmeg liver”). B- The hepatic histoarchitecture  
820 is distorted and hepatic cords are disorganized and separated by areas of fibroplasia  
821 characterized by spindle cells (fibroblasts) embedded in a pale eosinophilic fibrillar  
822 (collagenous) extracellular matrix. H&E stain, original magnification 400X. C- Some  
823 hepatocytes are individualized and detached from the hepatic cords, and are shrunken,  
824 with angular cell borders, hypereosinophilic cytoplasm and pyknosis or karyorrhexis  
825 (hepatocellular necrosis/apoptosis); others have one or few clear intracytoplasmic  
826 vacuoles consistent with lipidosis. There are increased numbers of lymphocytes in the  
827 sinuses (hepatitis). H&E stain, original magnification 630X. D- A portal tract (center) is  
828 infiltrated by moderate numbers of lymphocytes and macrophages (portal hepatitis).  
829 H&E stain, original magnification 400X.

830 **Fig 3. Transmission electron microscopy in the kidney of the aborted fetus.** A- The  
831 nucleus of a tubular epithelial cell contains a dense array of viral particles forming a  
832 round inclusion (7,190X, bar= 2  $\mu$ m). B- Higher magnification of A showing the array  
833 of viral particles (70,000X, bar= 200 nm).

834 **Fig 4. Genome organization of BoPyV-1/Faber/2021/Uy (GenBank accession**  
835 **number OM938033).** The different proteins are represented with arrows according to  
836 their location in the genome; arrow direction indicates the strand. The agnoprotein  
837 (position 220–250), VP1 (position 1,540–2,637), VP2 (position 618–1,679), and VP3  
838 (position 981–1,679) are located on one strand and the LT antigen (joined positions  
839 2,690–4,345, 4,423–4,502 and 4,574–4,697), and the ST antigen (joined positions  
840 4,252–4,502 and 4,574–4,697) are located on the complementary strand. The complete  
841 genome length of BoPyV-1/Faber/2021/Uy is 4,697 base pairs.

842 **Fig 5. Phylogenetic analyses.** A- Phylogenetic tree for LT antigen amino acid  
843 sequences. Representative sequences of all ICTV recognized genera, all polyomavirus  
844 sequences of bovine origin from GenBank, and the sequence obtained in this work (in  
845 red font) were used. Sequences were aligned with ClustalW. The best substitution  
846 model (rtREV+F+I+G4) and the maximum likelihood phylogenetic tree were obtained  
847 with IQ-TREE web server. Branch support analysis was SH-aLRT branch test  
848 implemented in the IQ-TREE web server (1,000 replicates). B- Phylogenetic tree using  
849 complete genome nucleotide sequences. All polyomavirus sequences of bovine origin  
850 from GenBank and the sequence obtained in this work (in red font) were used.  
851 Sequences were aligned with ClustalW, and the best substitution model (K3Pu+F+G4)  
852 and the maximum likelihood phylogenetic tree were jointly obtained with IQ-TREE  
853 web server. Branch support analysis was SH-aLRT branch test implemented in the IQ-  
854 TREE web server (1,000 replicates).

855 **Fig 6. BoPyV-1 isolation in MDBK cells.** A- Cytopathic effect after 96 hours of  
856 incubation is characterized by cytoplasmic vacuolation and lysis with loss of the  
857 monolayer (center) in infected MDBK cells. B- In the negative control, uninfected  
858 MDBK cells form a continuous monolayer. Original magnifications 200X.

859

860 **Supporting information**

861 **S1 Fig. Coverage of the Oxford Nanopore Technology reads across the genome.** In  
862 the upper panel the coverage of the reads across the reference genome (GenBank  
863 accession number D13942) is shown. In the lower panel, the GC content (%) and the  
864 mean GC content across the reference genome is shown.

865 **S2 Fig. Phylogenetic analyses of LT antigen, ST antigen, VP1, VP2 and VP3.** The  
866 maximum likelihood trees obtained with IQ-TREE web server with nucleotide (A, C, E,  
867 G, and I) and amino acid (B, D, F, H, and J) sequences are shown. All the BoPyV  
868 sequences available in the database were downloaded and together with BoPyV-  
869 1/Faber/2021/Uy were aligned with Clustal W. The best substitution model was jointly  
870 obtained with the tree using the IQ-TREE web server. The analyses were performed  
871 using LT antigen (A and B), ST antigen (C and D), VP1 (E and F), VP2 (G and H), and  
872 VP3 (I and J). Some sequences are not shown in the trees because IQ-TREE discarded  
873 them since they were identical to others. Branch support analysis was SH-aLRT branch  
874 test implemented in the IQ-TREE web server.

875

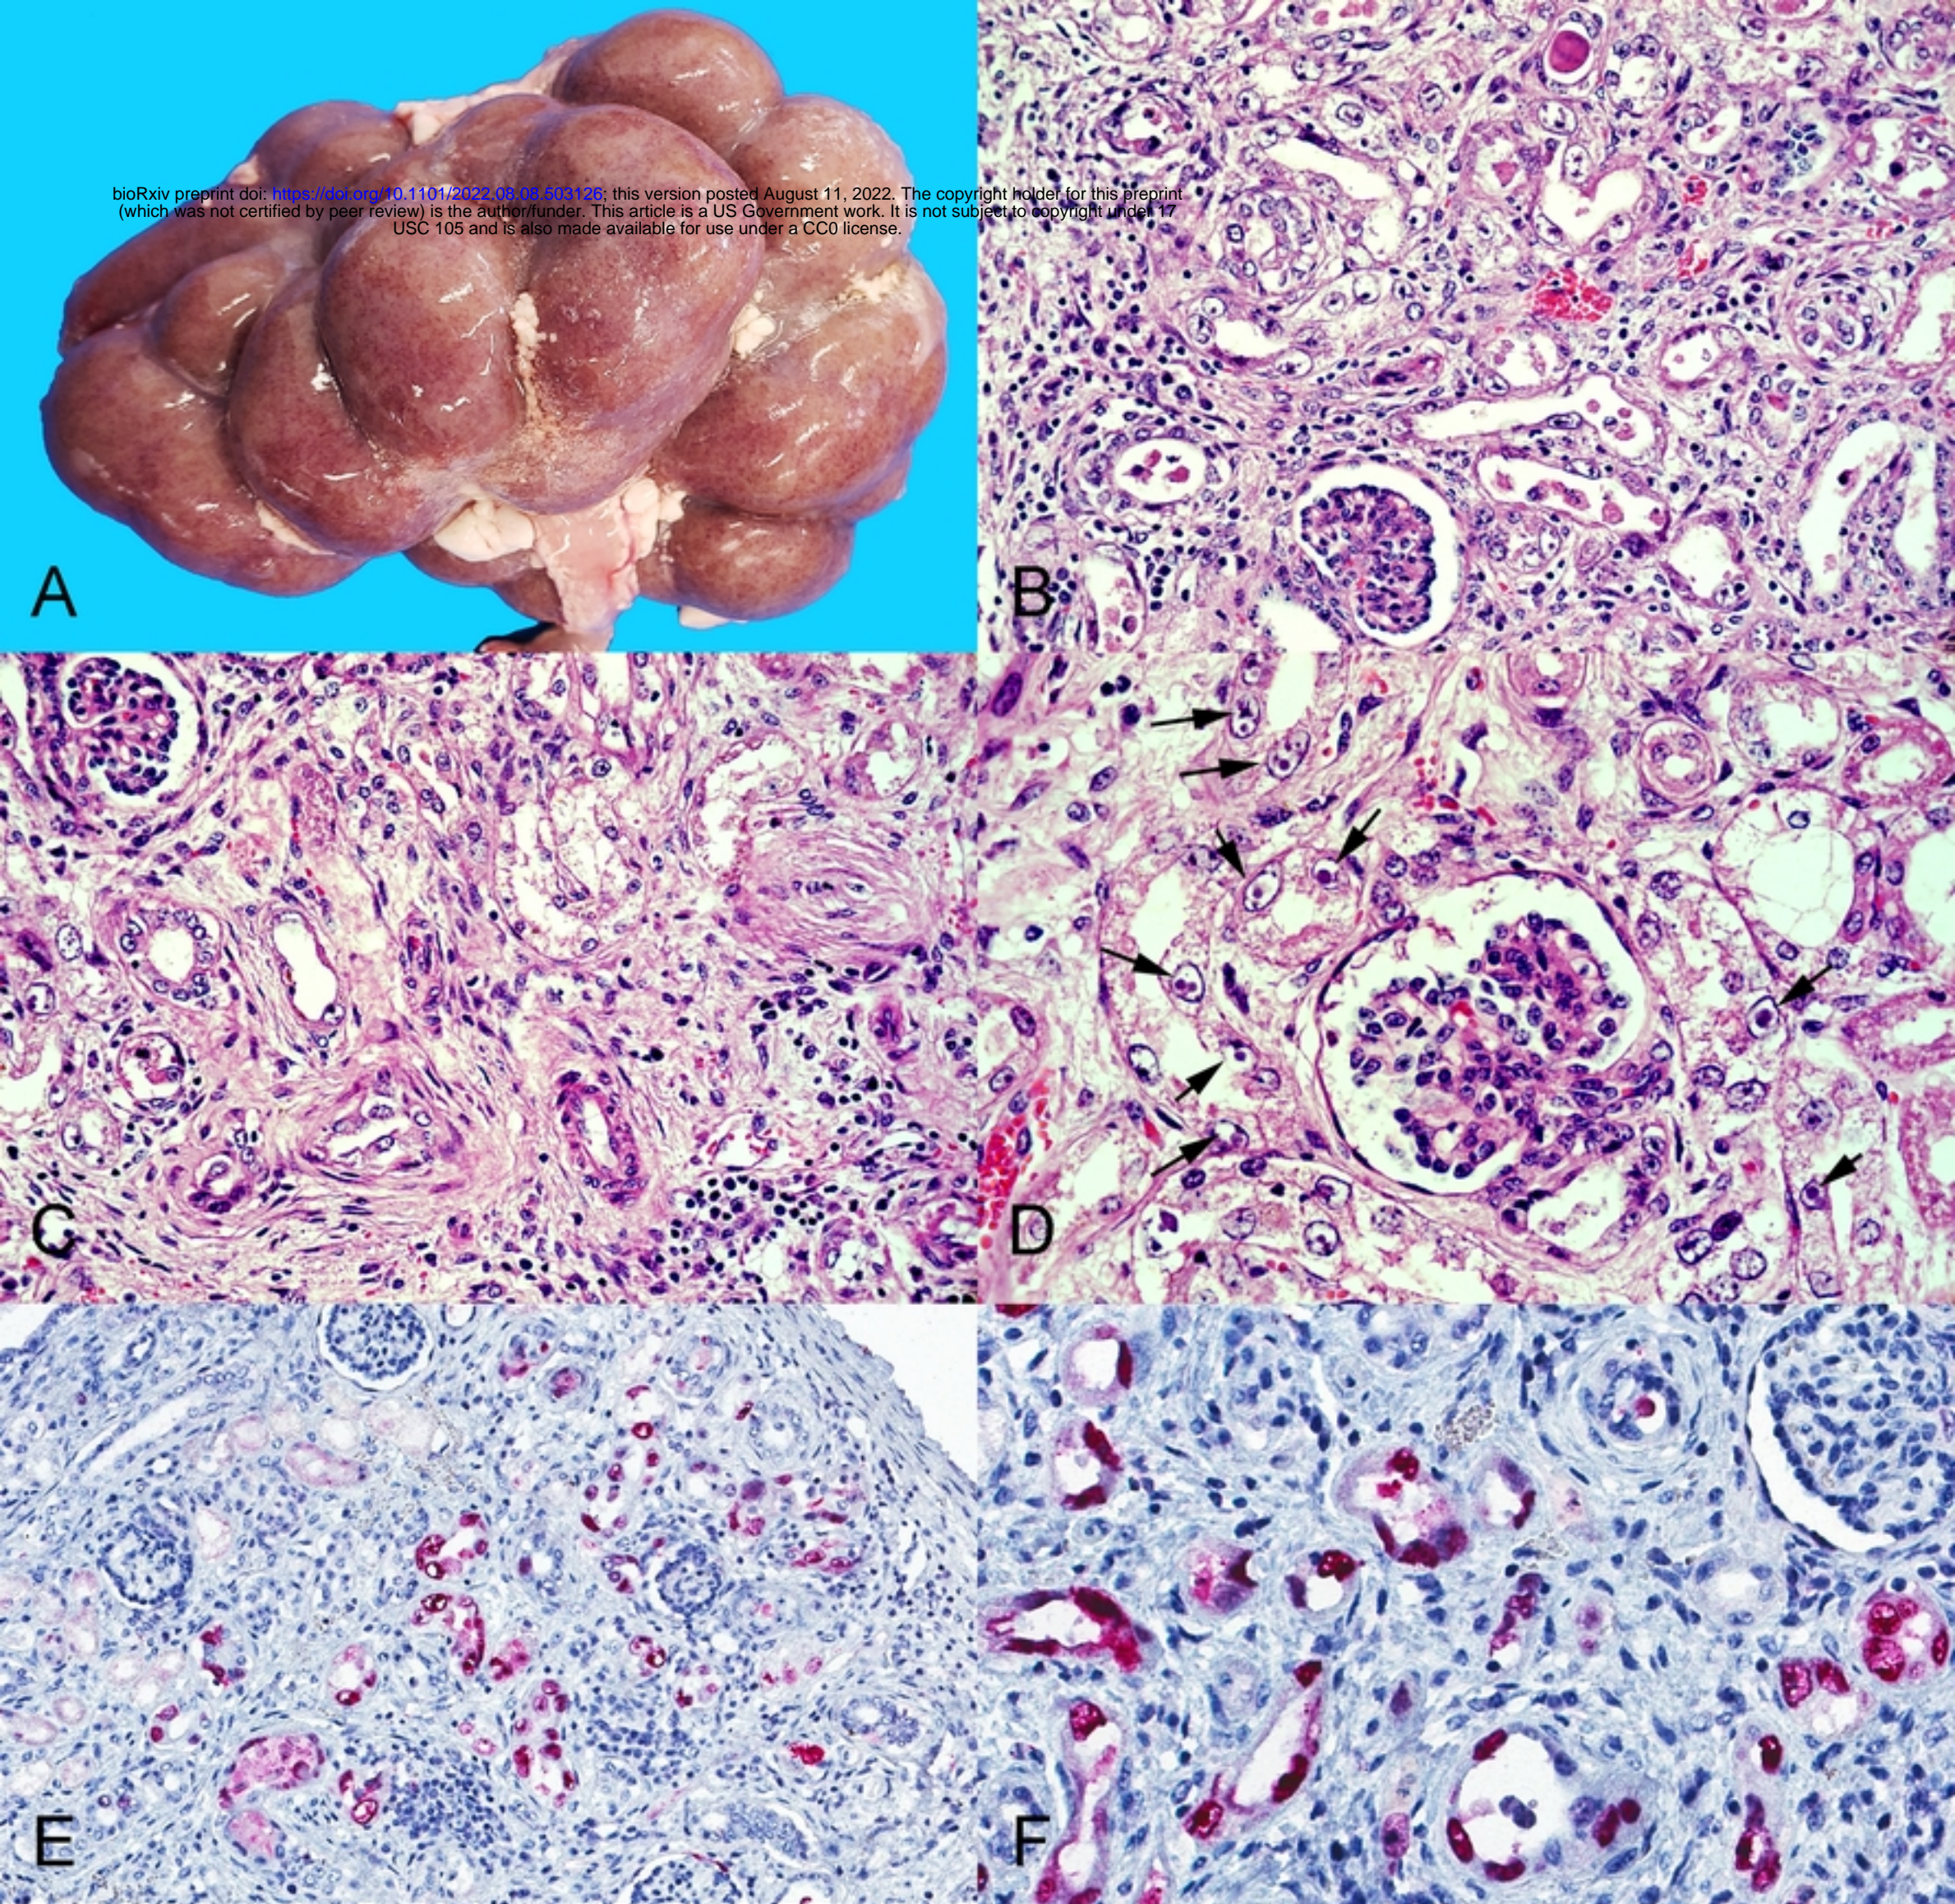

Figure

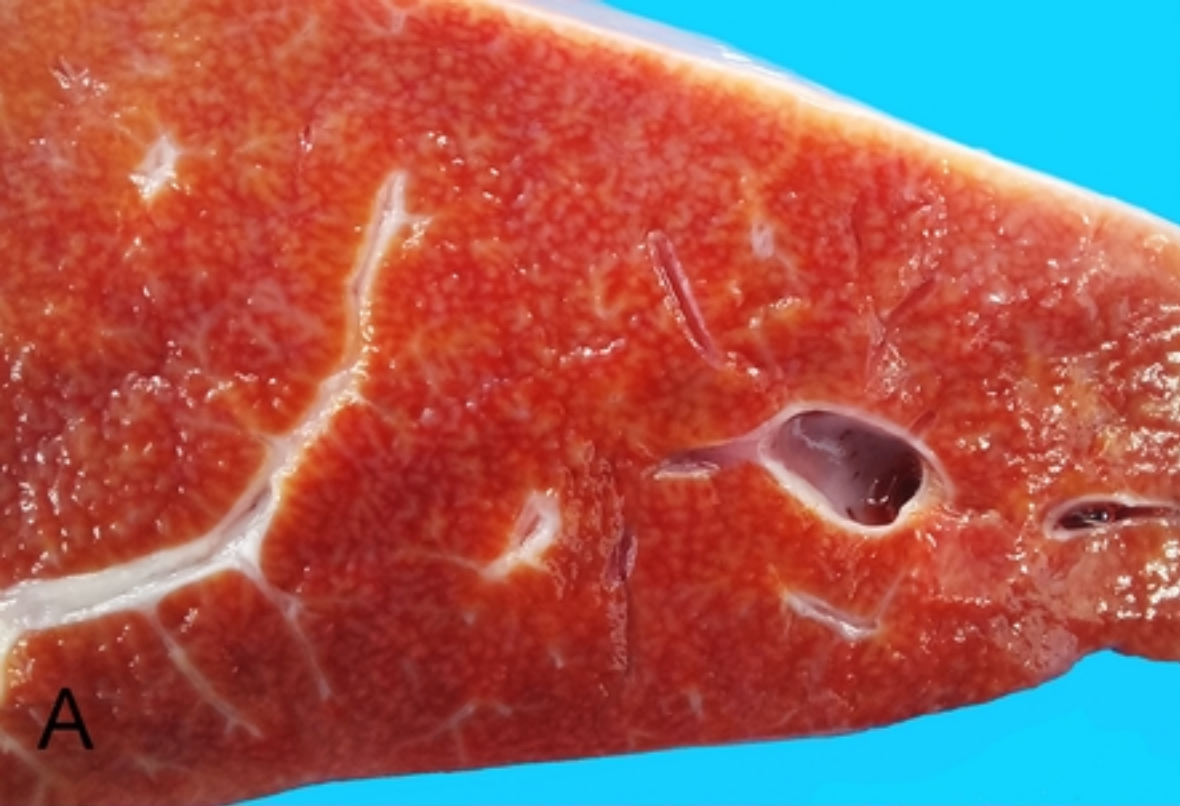

A

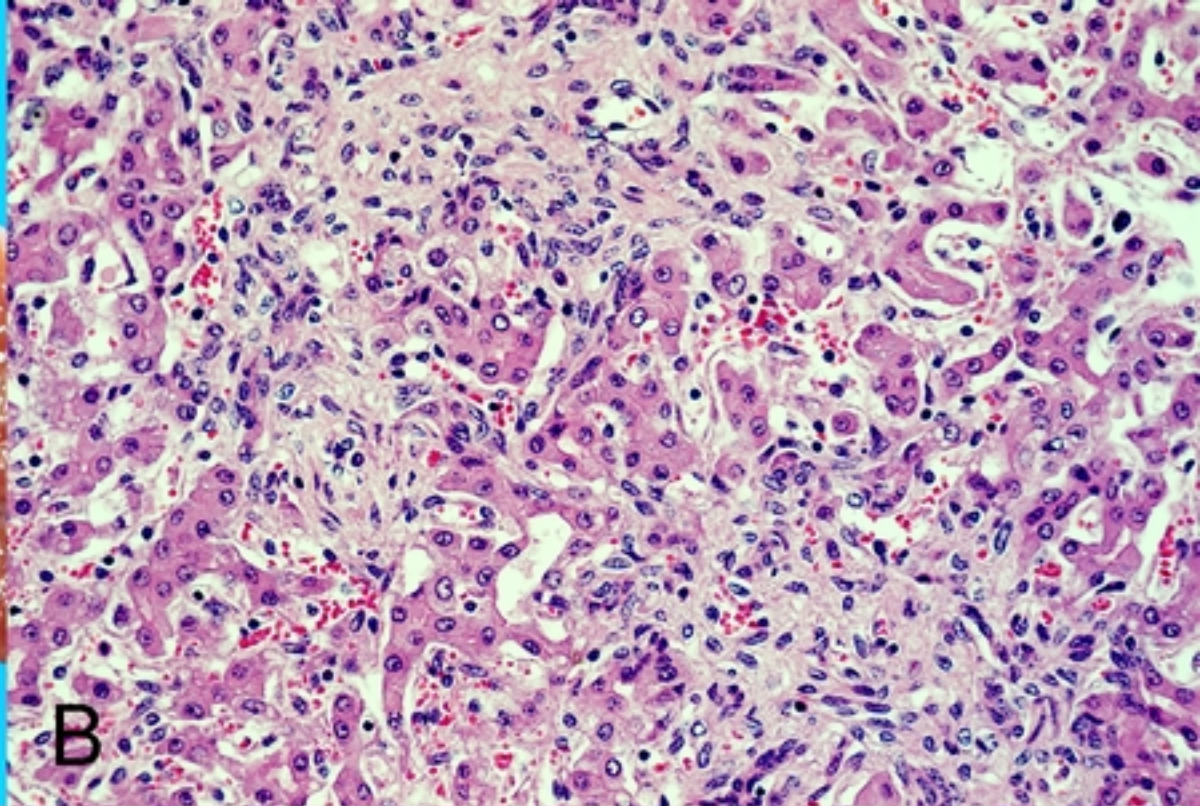

B

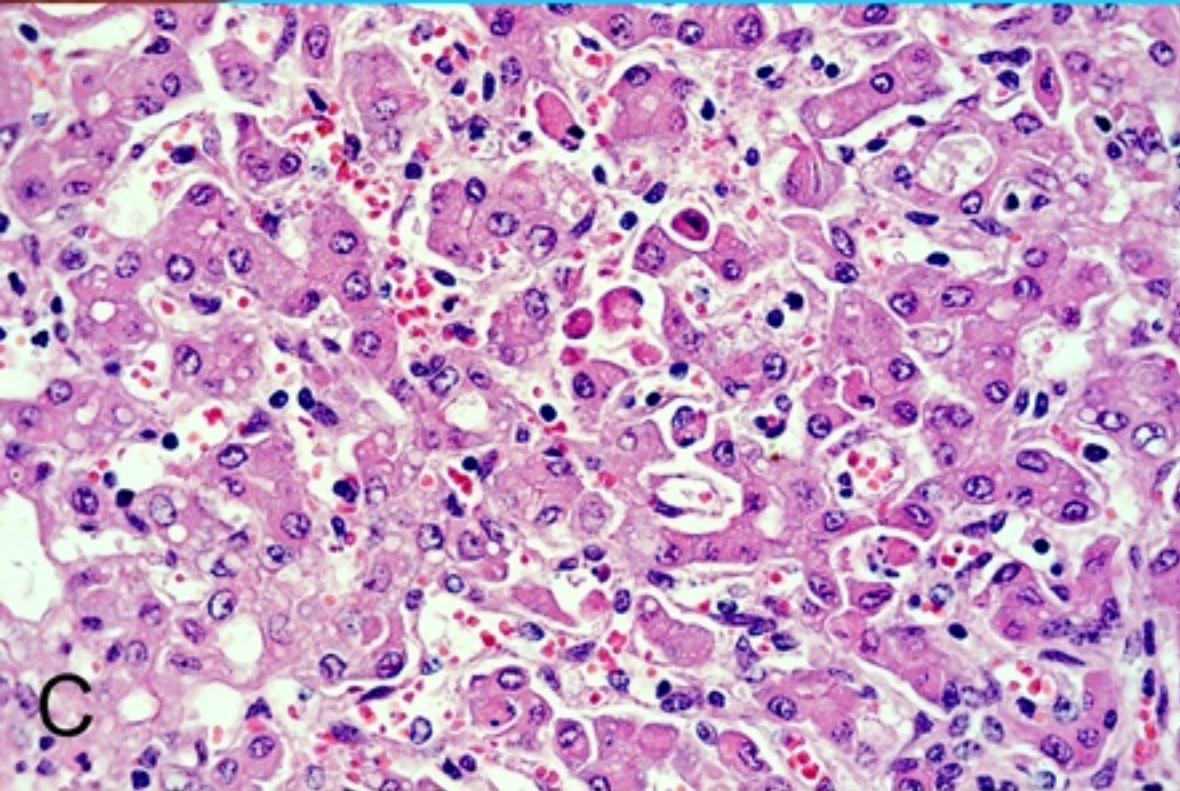

C

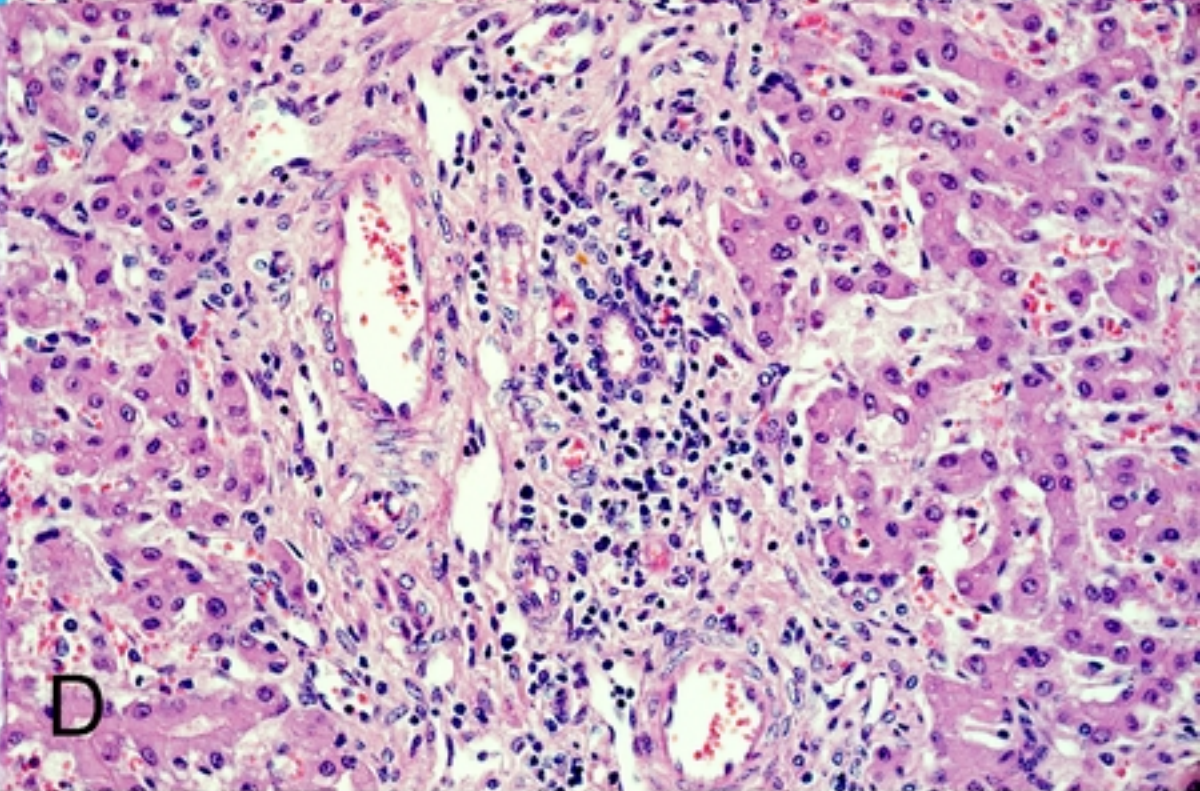

D

Figure

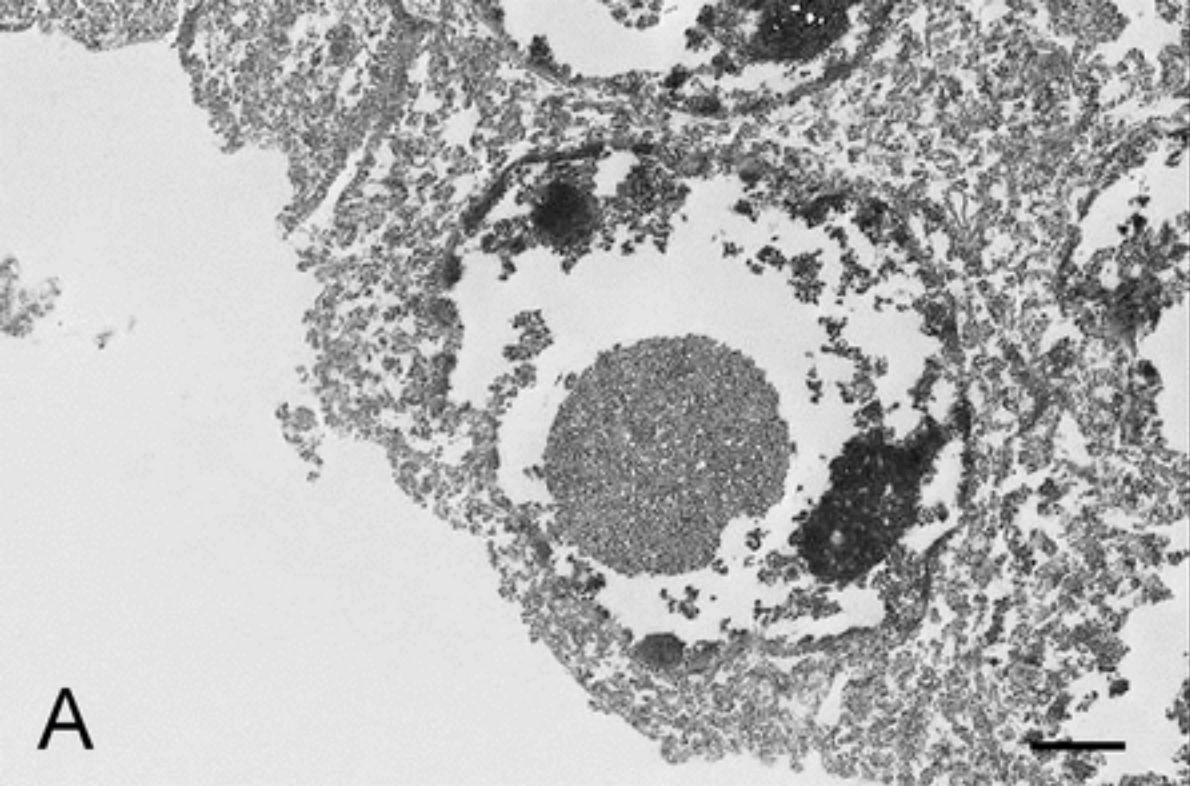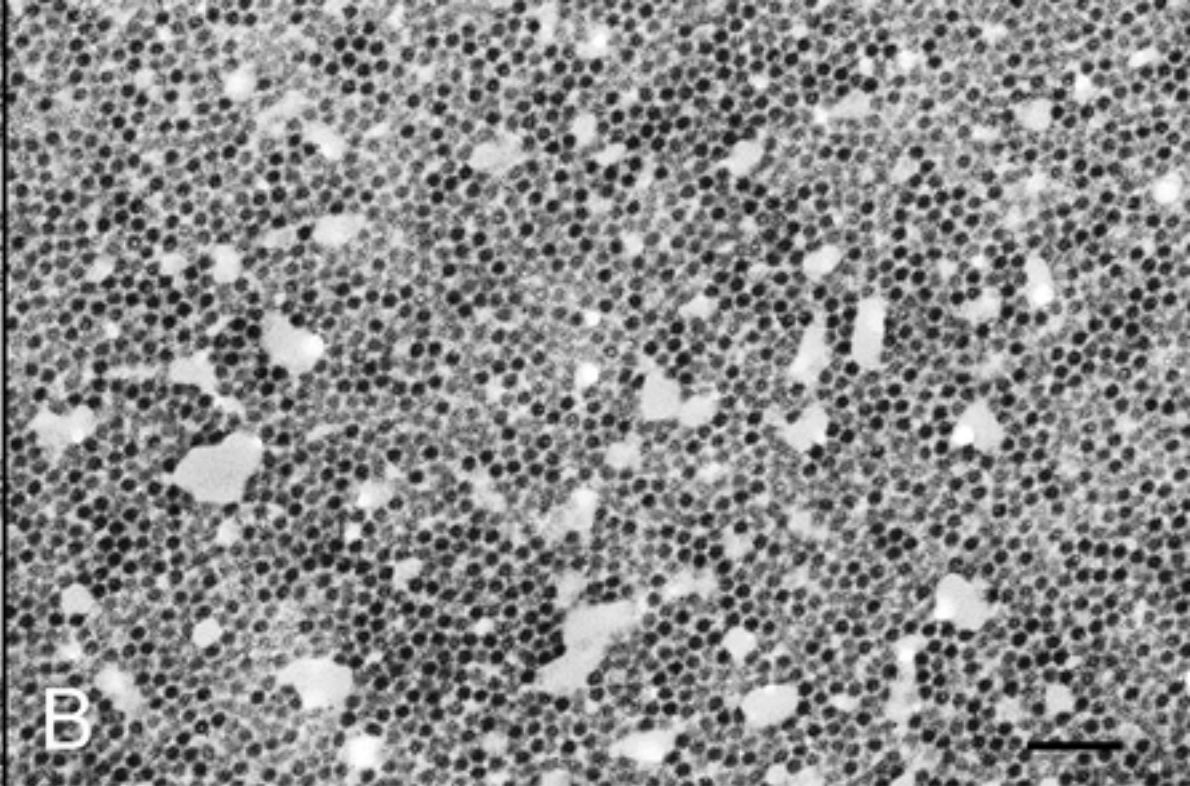

Figure



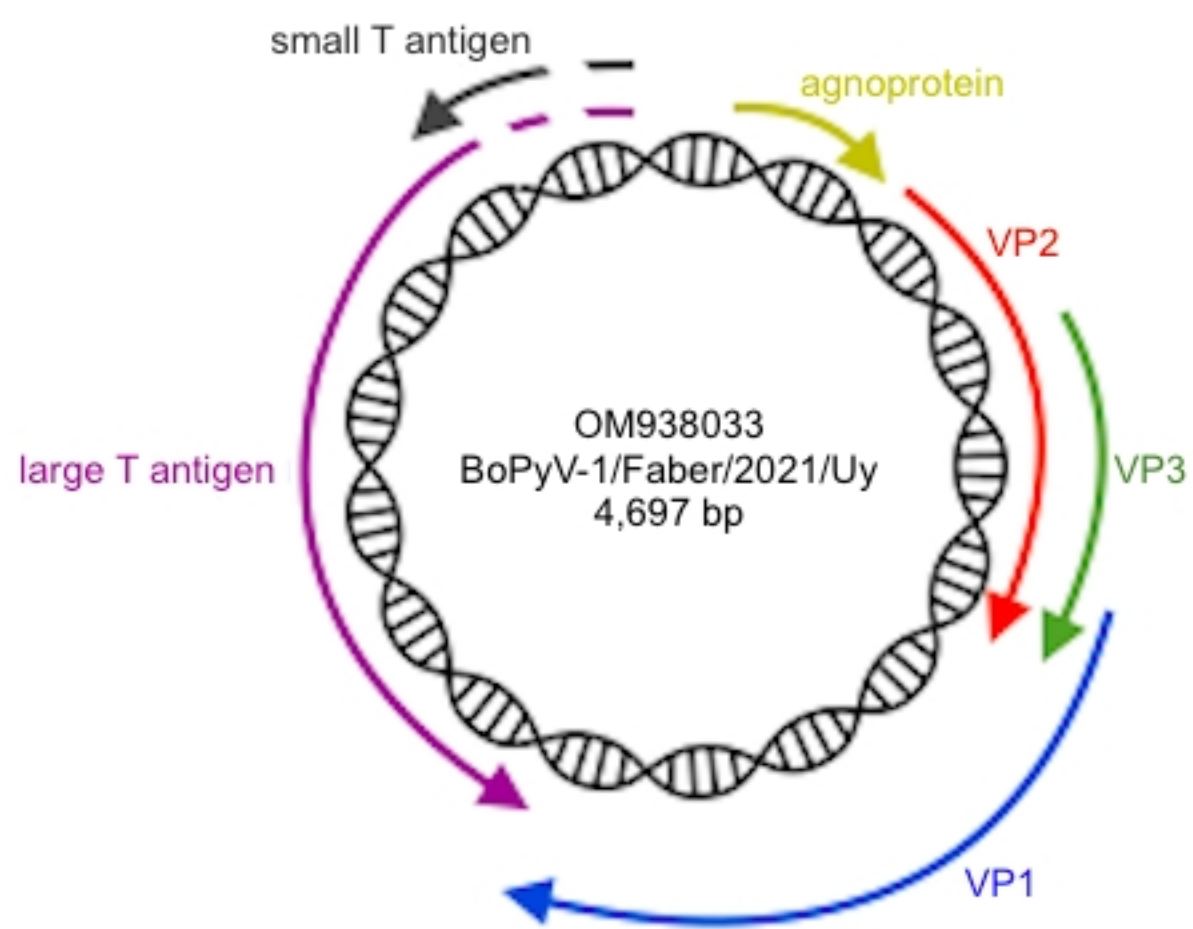

Figure

**A**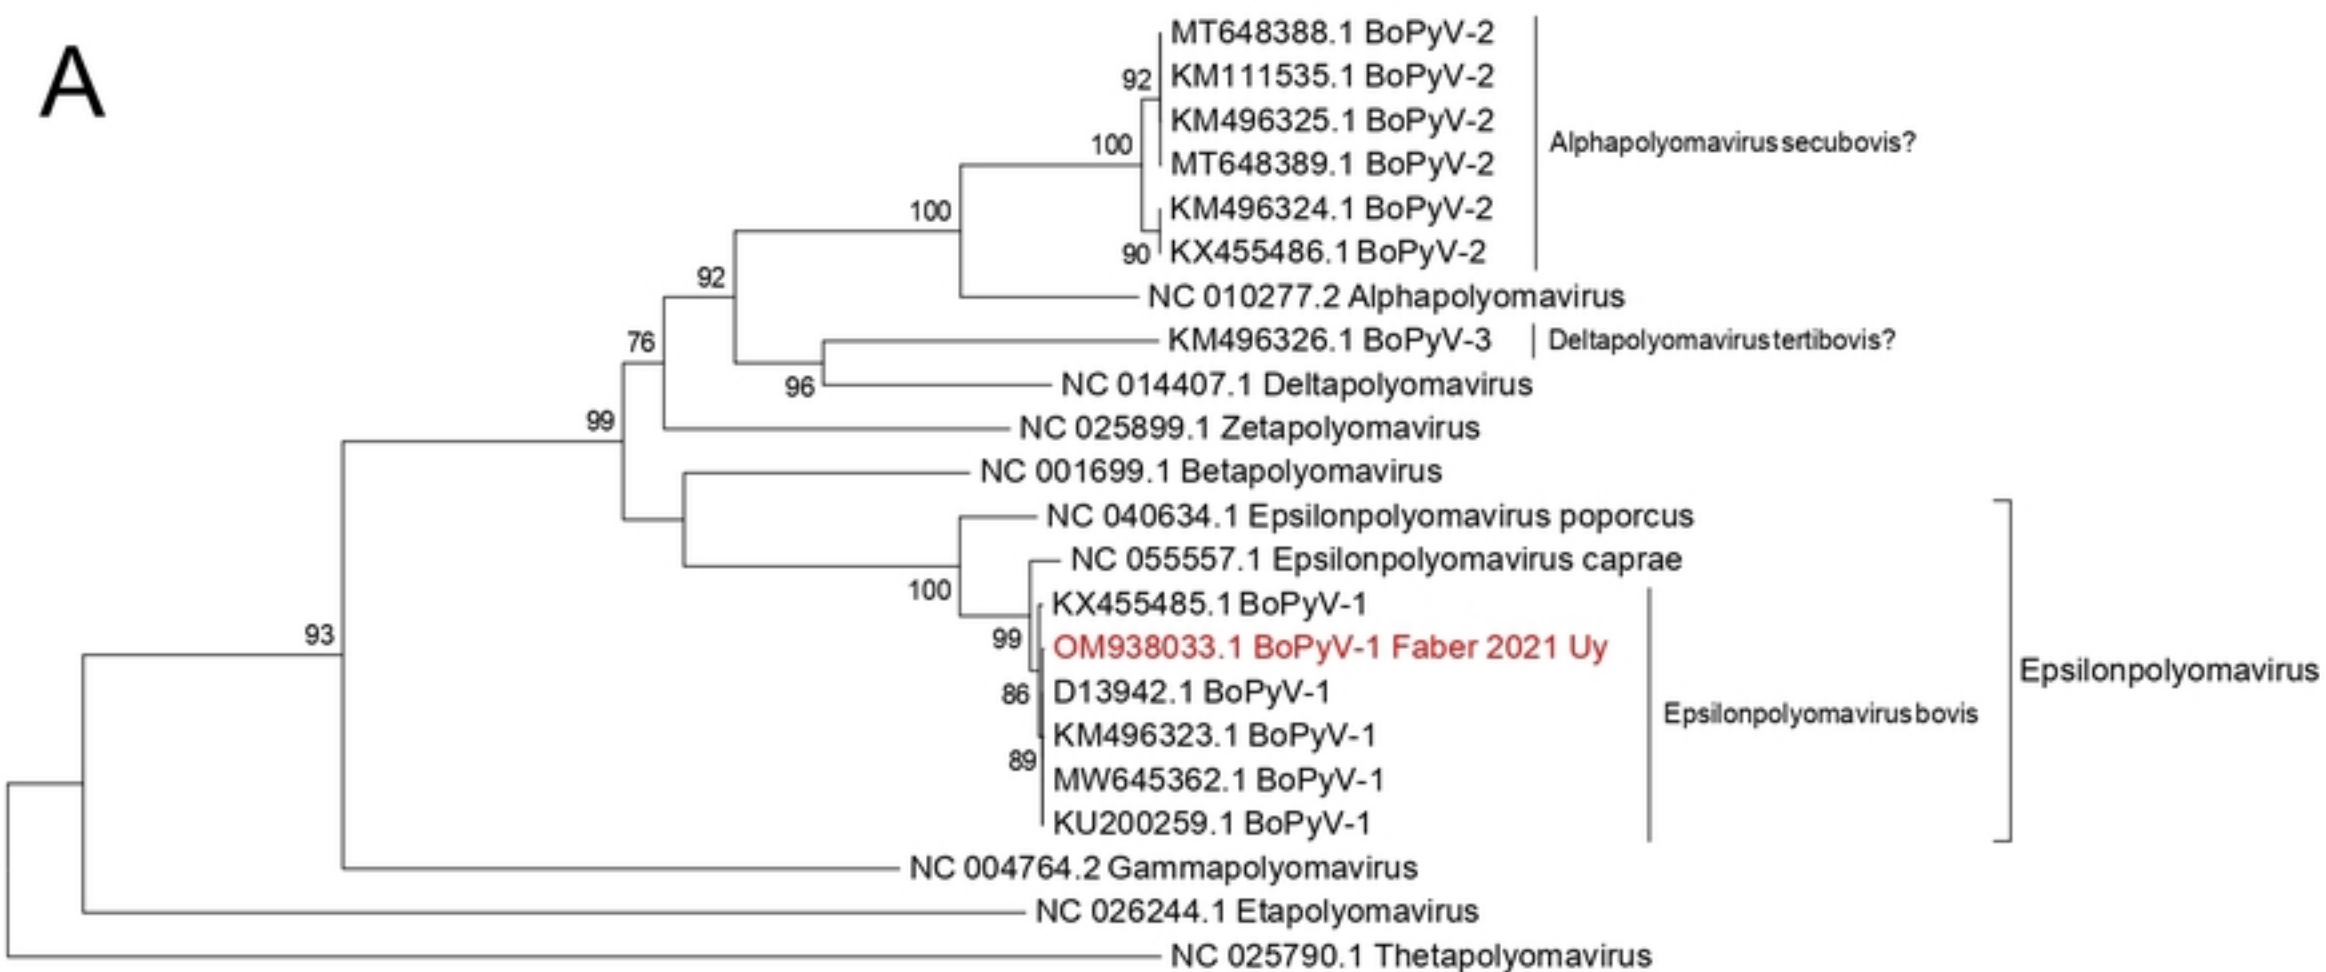**B**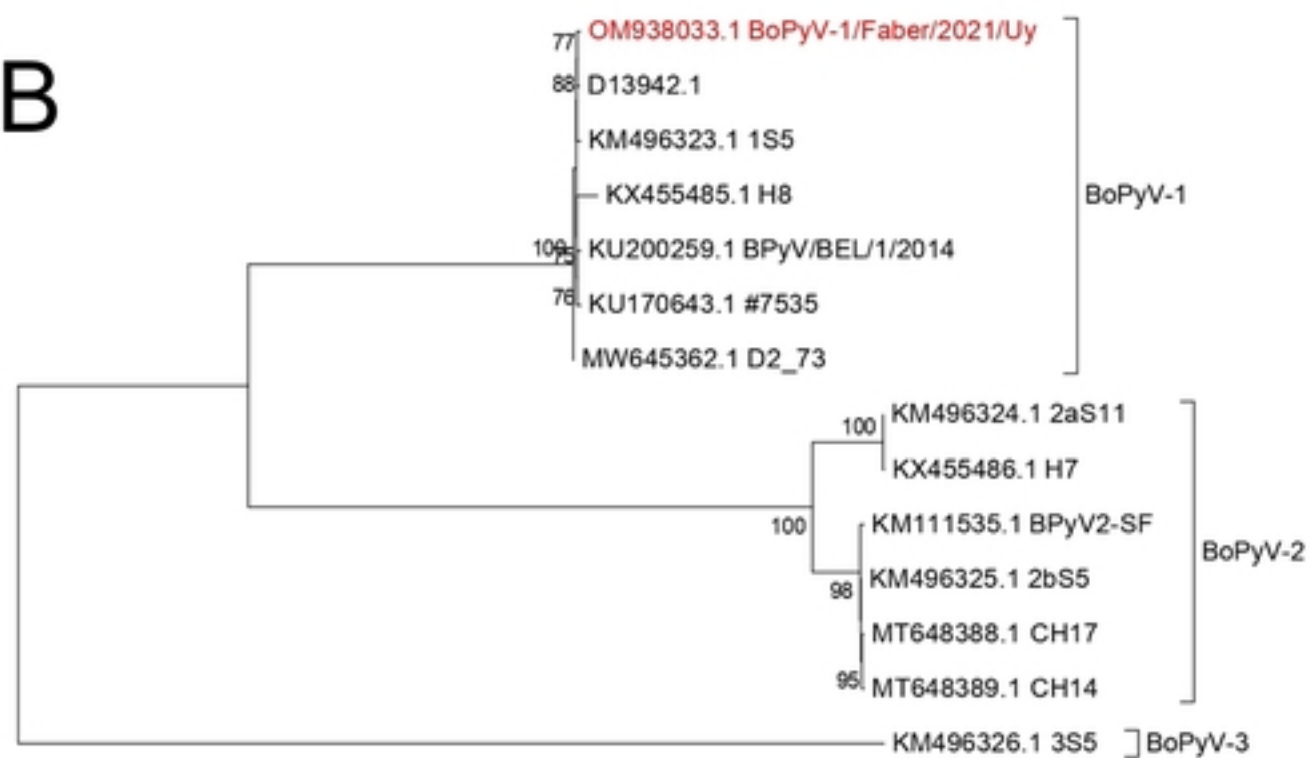**Figure**

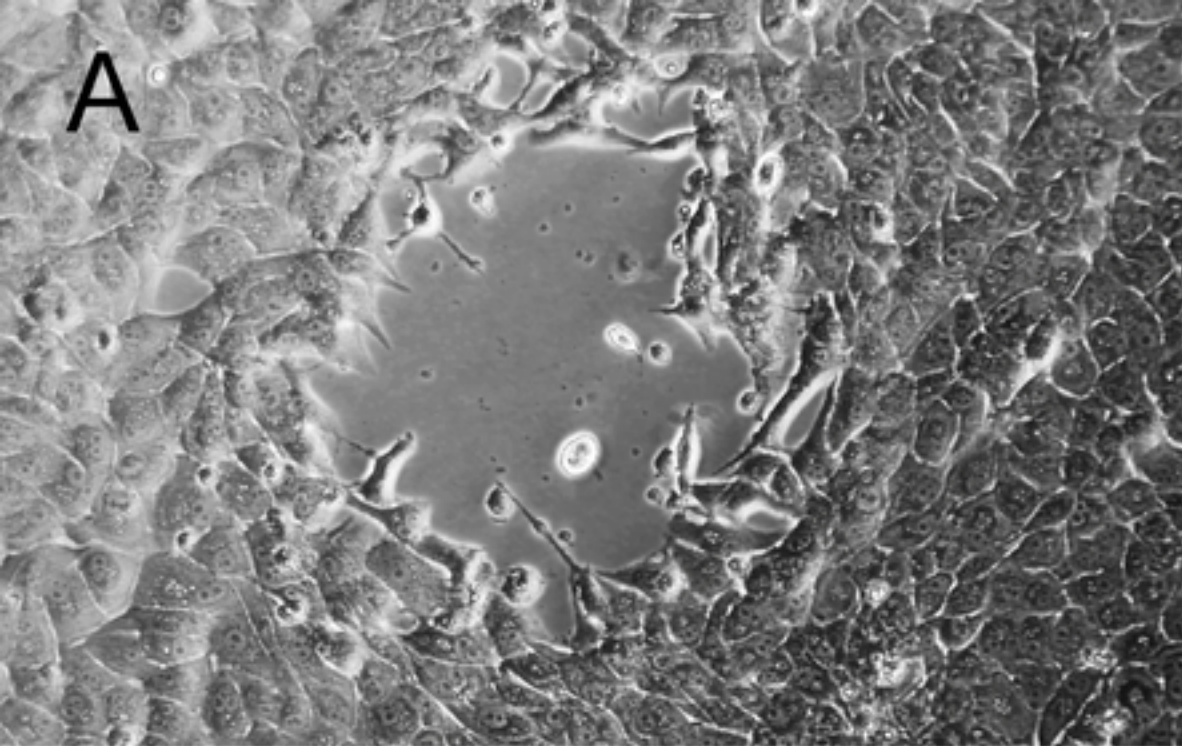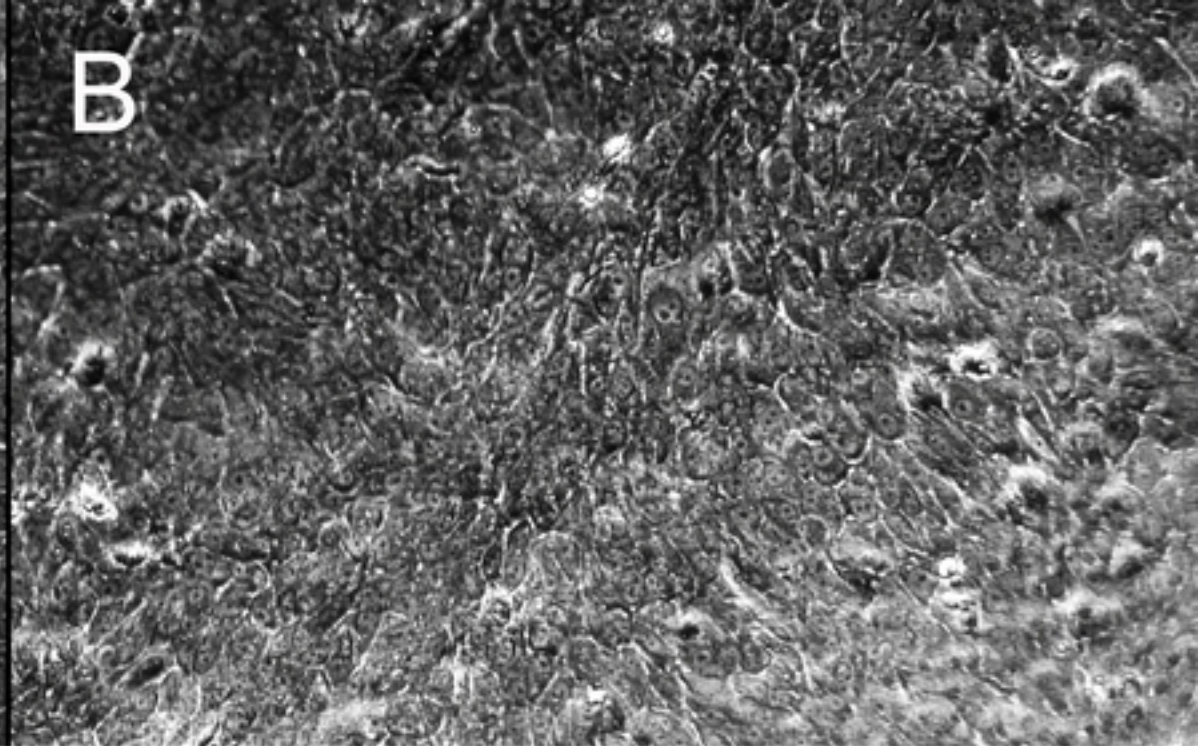

Figure

## Coverage across reference

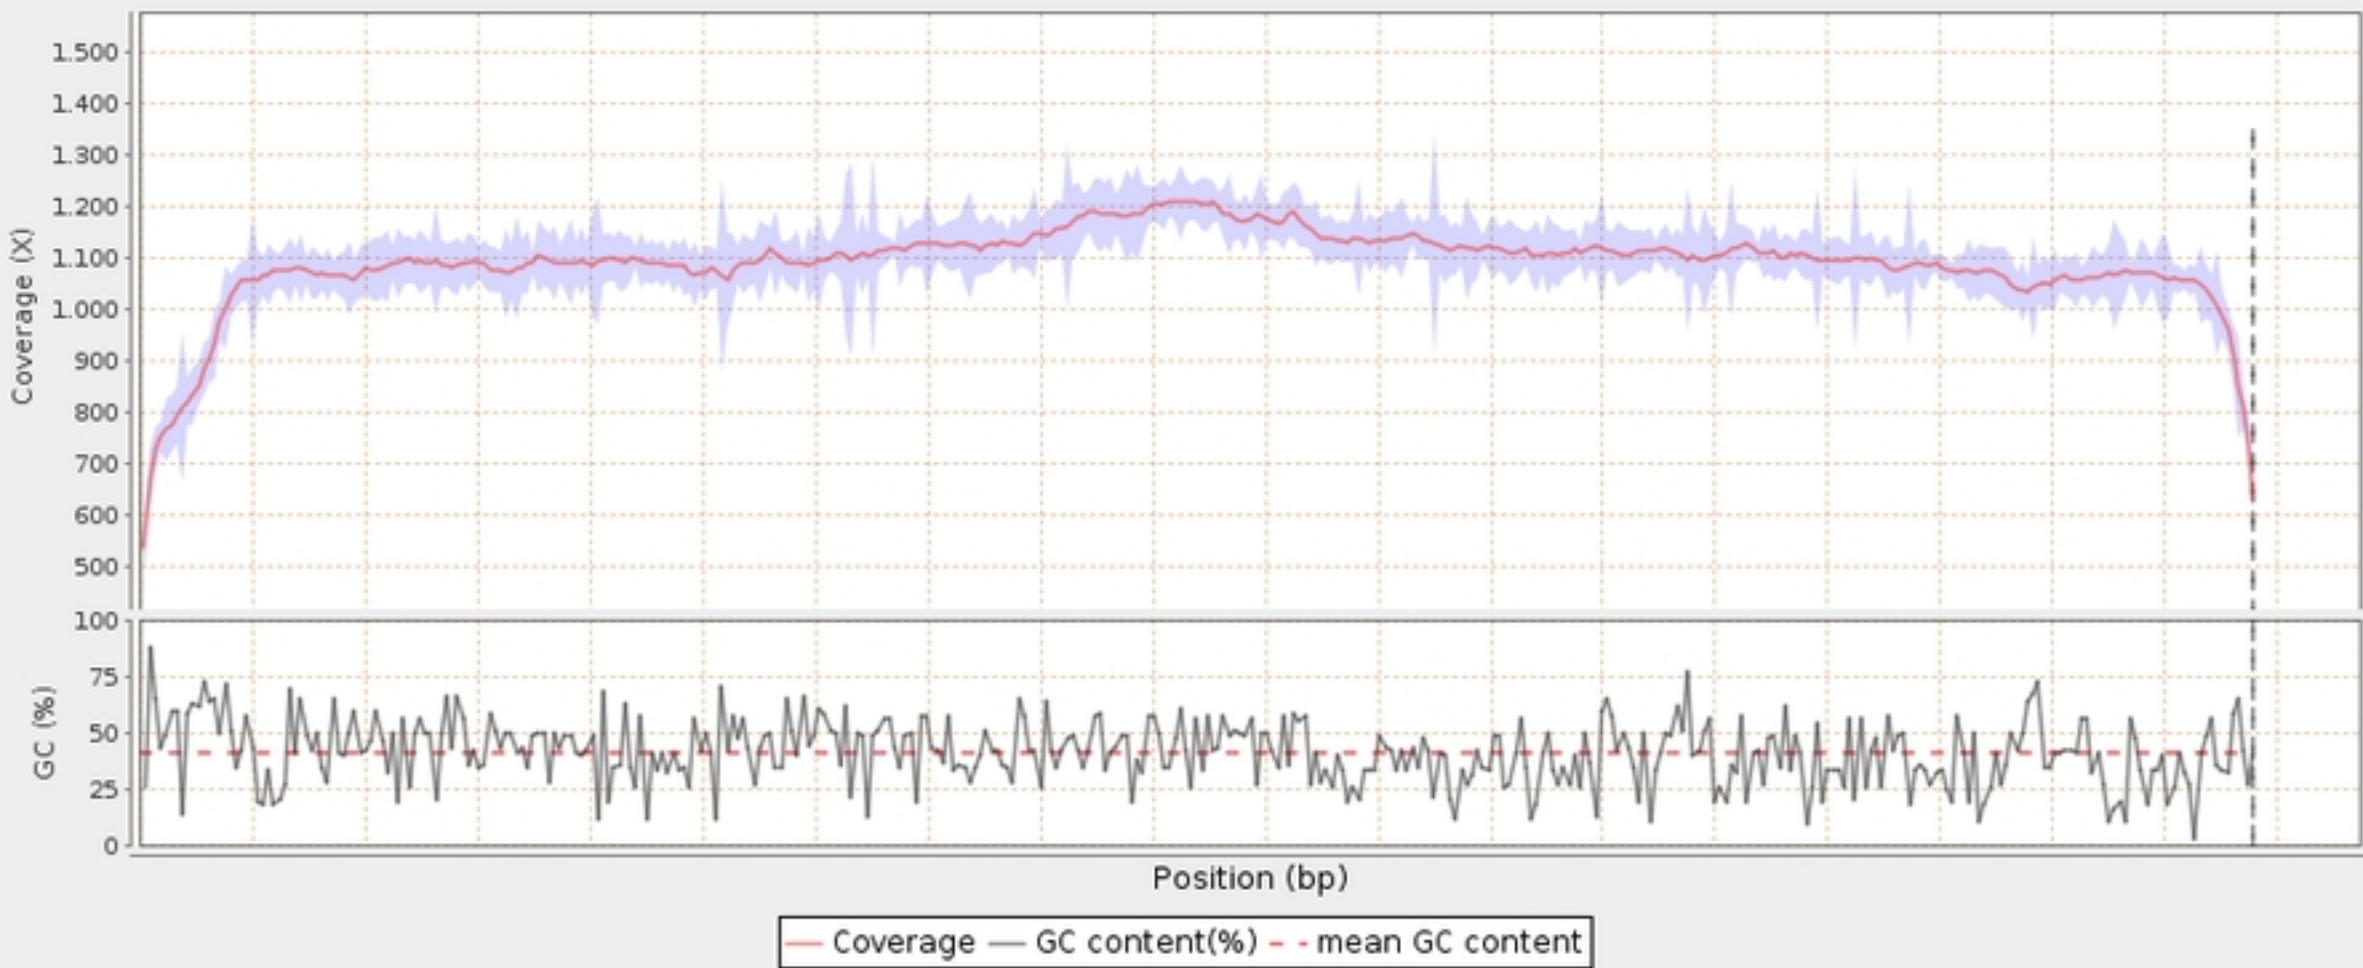

Figure

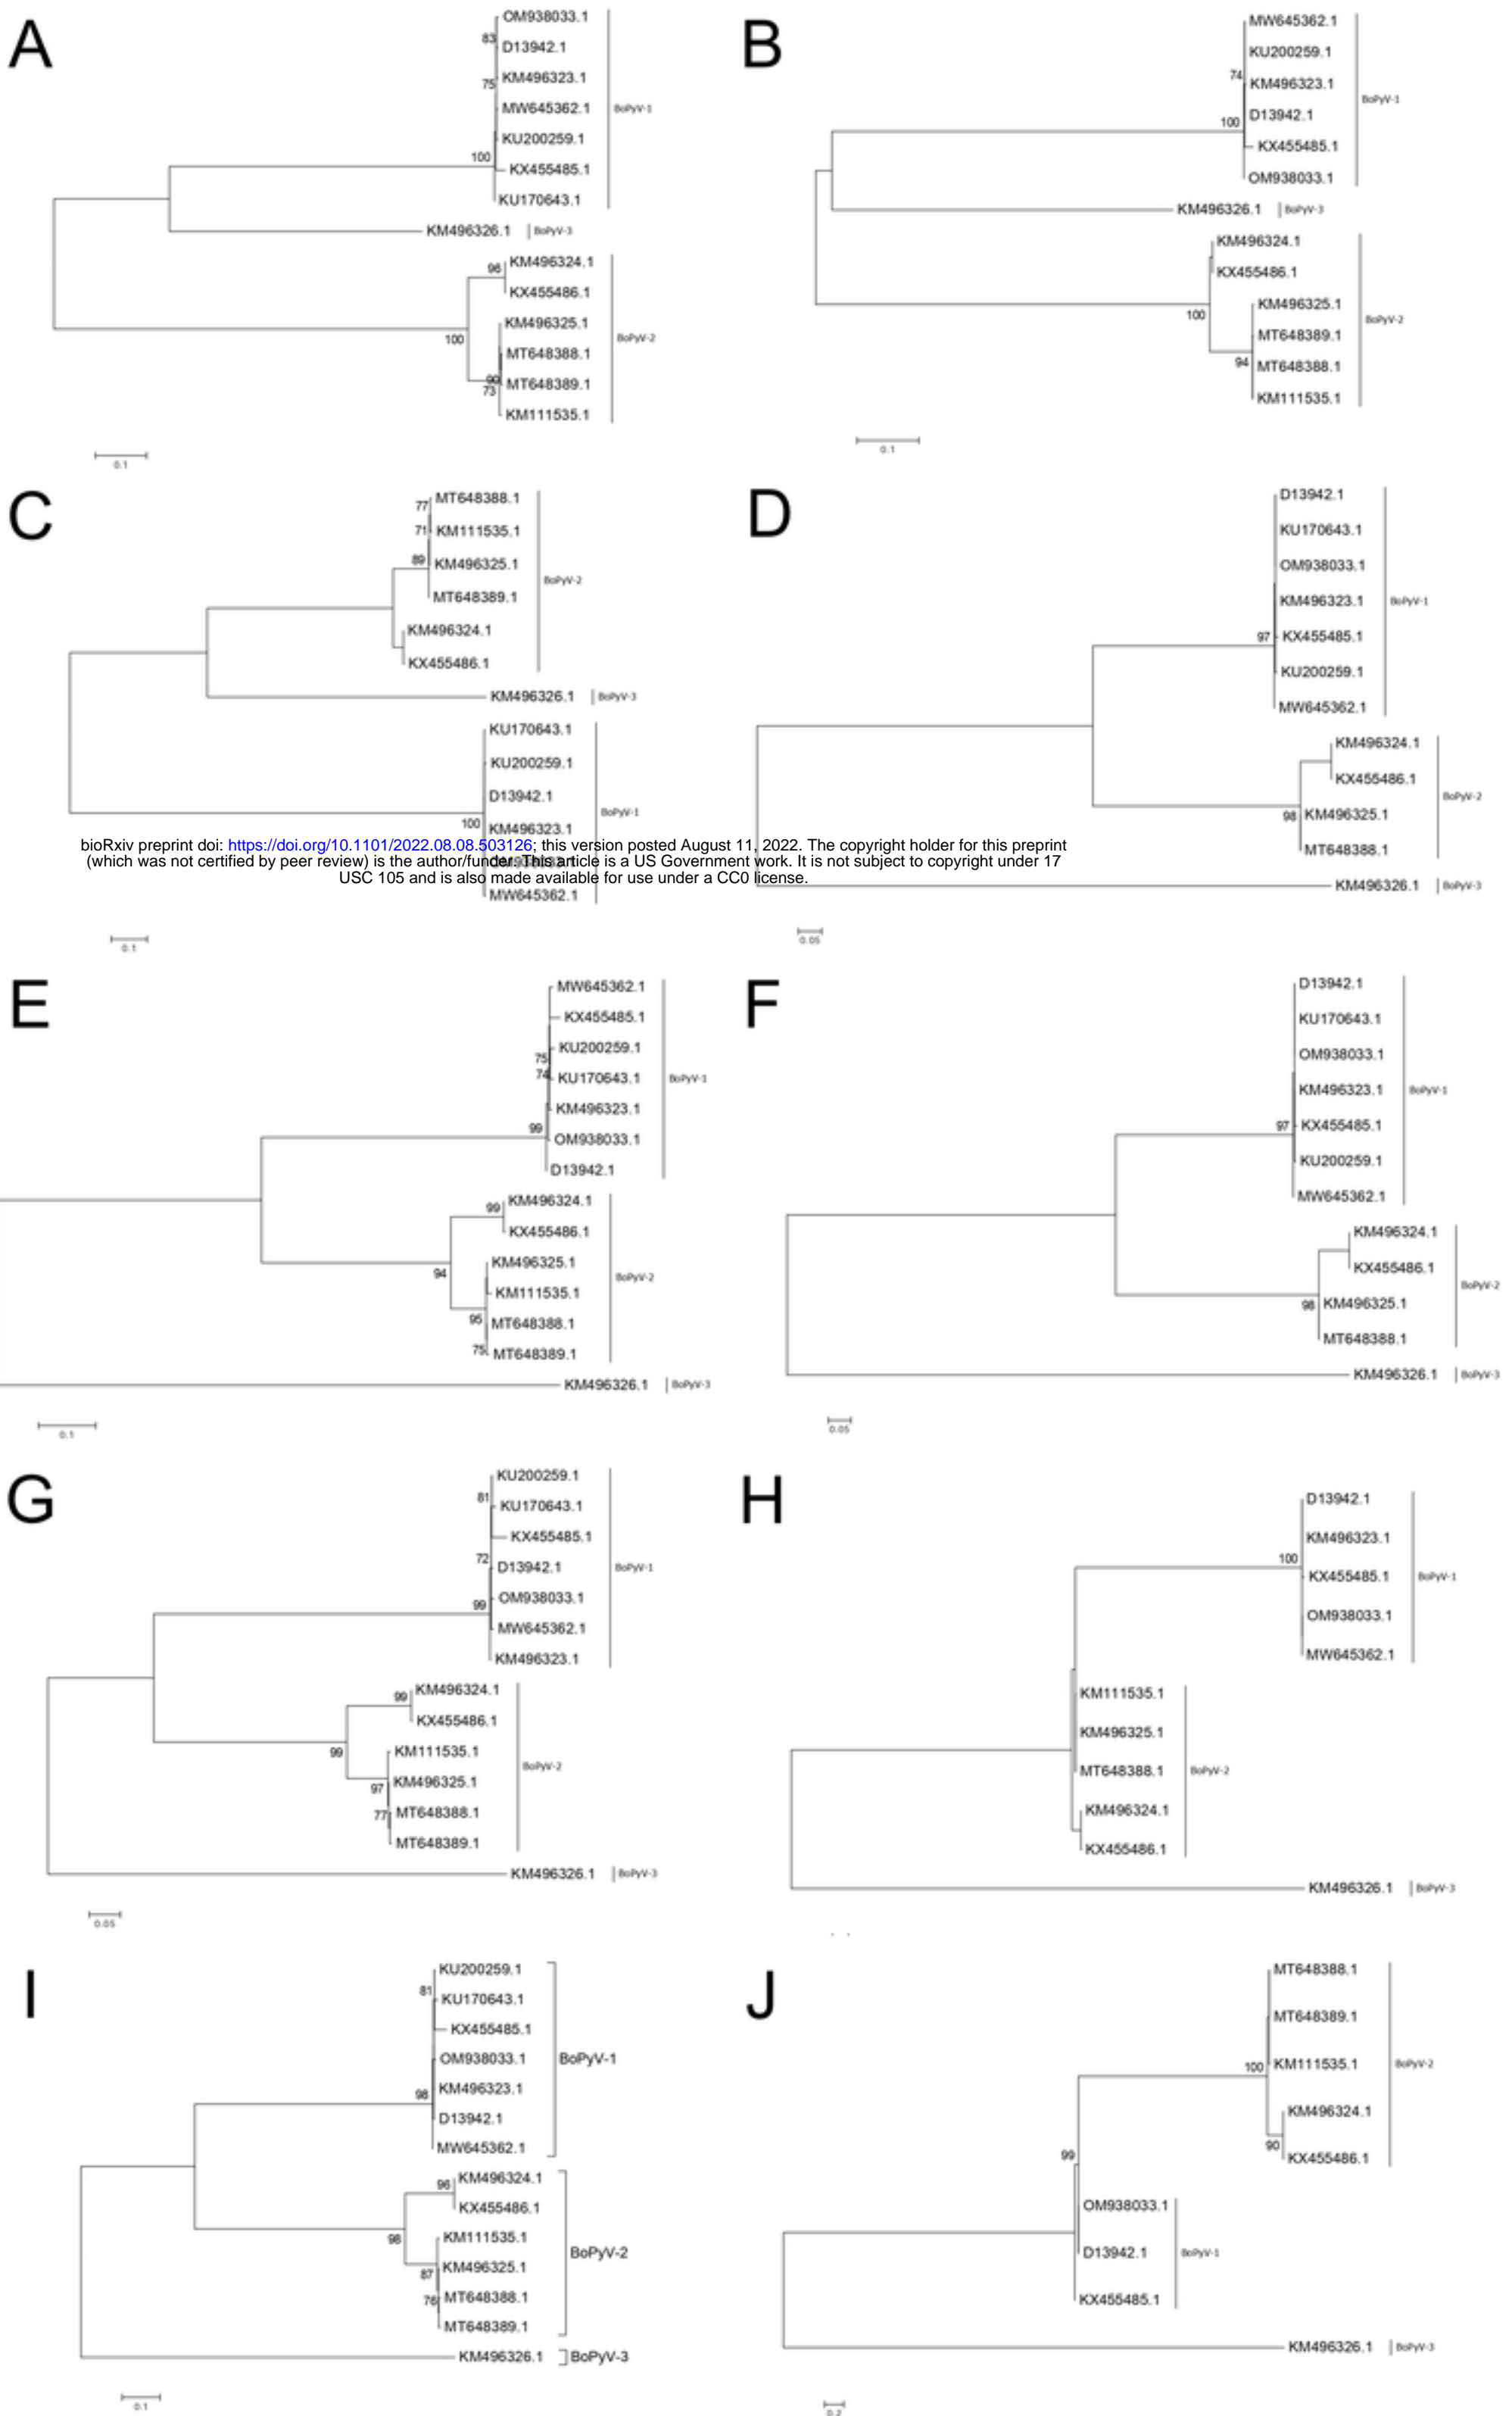

bioRxiv preprint doi: <https://doi.org/10.1101/2022.08.08.503126>; this version posted August 11, 2022. The copyright holder for this preprint (which was not certified by peer review) is the author/funder. All rights reserved. No reuse allowed without permission. This article is a US Government work. It is not subject to copyright under 17 USC 105 and is also made available for use under a CC0 license.
